1 **Binding specificities of human RNA binding proteins towards structured and linear**  
2 **RNA sequences**

3  
4 Arttu Jolma<sup>1,\*</sup>, Jilin Zhang<sup>1,\*</sup>, Estefania Mondragón<sup>4,\*</sup>, Teemu Kivioja<sup>2</sup>, Yimeng Yin<sup>1</sup>, Fangjie  
5 Zhu<sup>1</sup>, Quaid Morris<sup>5,6,7,8</sup>, Timothy R. Hughes<sup>5,6</sup>, L. James Maher III<sup>4</sup> and Jussi Taipale<sup>1,2,3,#</sup>

6  
7 <sup>1</sup>*Department of Medical Biochemistry and Biophysics, Karolinska Institutet, Solna, Sweden*

8 <sup>2</sup>*Genome-Scale Biology Program, University of Helsinki, Helsinki, Finland*

9 <sup>3</sup>*Department of Biochemistry, University of Cambridge, Cambridge CB2 1GA, United Kingdom*

10 <sup>4</sup>*Department of Biochemistry and Molecular Biology, Mayo Clinic College of Medicine and*  
11 *Science, Rochester, USA*

12 <sup>5</sup>*Department of Molecular Genetics, University of Toronto, Toronto, Canada*

13 <sup>6</sup>*Donnelly Centre, University of Toronto, Toronto, Canada*

14 <sup>7</sup>*Edward S Rogers Sr Department of Electrical and Computer Engineering, University of*  
15 *Toronto, Toronto, Canada*

16 <sup>8</sup>*Department of Computer Science, University of Toronto, Toronto, Canada*

17  
18 *\*Authors contributed equally*

19 *#Corresponding author*

20  
21  
22 **ABSTRACT**

23  
24 **Sequence specific RNA-binding proteins (RBPs) control many important**  
25 **processes affecting gene expression. They regulate RNA metabolism at multiple levels,**  
26 **by affecting splicing of nascent transcripts, RNA folding, base modification, transport,**  
27 **localization, translation and stability. Despite their central role in most aspects of RNA**  
28 **metabolism and function, most RBP binding specificities remain unknown or**  
29 **incompletely defined. To address this, we have assembled a genome-scale collection**  
30 **of RBPs and their RNA binding domains (RBDs), and assessed their specificities using**  
31 **high throughput RNA-SELEX (HTR-SELEX). Approximately 70% of RBPs for which we**  
32 **obtained a motif bound to short linear sequences, whereas ~30% preferred**  
33 **structured motifs folding into stem-loops. We also found that many RBPs can bind to**  
34 **multiple distinctly different motifs. Analysis of the matches of the motifs on human**  
35 **genomic sequences suggested novel roles for many RBPs in regulation of splicing, and**  
36 **also revealed RBPs that are likely to control specific classes of transcripts. Global**  
37 **analysis of the motifs also revealed an enrichment of G and U nucleotides. Masking of**  
38 **G and U by proteins increases the specificity of RNA folding, as both G and U can pair**  
39 **to two other RNA bases via canonical Watson-Crick or G-U base pairs. The collection**  
40 **containing 145 high resolution binding specificity models for 86 RBPs is the largest**  
41 **systematic resource for the analysis of human RBPs, and will greatly facilitate future**  
42 **analysis of the various biological roles of this important class of proteins.**

43  
44  
45

## 46 INTRODUCTION

47

48 The abundance of protein and RNA molecules in a cell depends both on their rates of  
49 production and degradation. These rates are determined directly or indirectly by the  
50 sequence of DNA. The transcription rate of RNA and the rate of degradation of proteins is  
51 determined by DNA and protein sequences, respectively. However, most regulatory steps  
52 that control gene expression are influenced by the sequence of the RNA itself. These  
53 processes include RNA splicing, localization, stability, and translation. These processes can  
54 be affected by RNA-binding proteins (RBPs) that specifically recognize short RNA sequence  
55 elements (Glisovic et al., 2008).

56 RBPs can recognize their target sites using two mechanisms: they can form direct  
57 contacts to the RNA bases of an unfolded RNA chain, and/or recognise folded RNA-structures  
58 (Loughlin et al., 2009). These two recognition modes are not mutually exclusive, and the  
59 same RBP can combine both mechanisms in recognition of its target sequence. The RBPs that  
60 bind to unfolded target sequences generally bind to each base independently of each other,  
61 and their specificity can thus be well explained by a simple position weight matrix (PWM)  
62 model. However, recognition of a folded RNA-sequence leads to strong positional  
63 interdependencies between different bases due to base pairing. In addition to the canonical  
64 Watson-Crick base pairs G:C and A:U, double-stranded RNA commonly contains also G:U  
65 base pairs, and can also accommodate other non-canonical base pairing configurations in  
66 specific structural contexts (Varani and McClain, 2000).

67 It has been estimated that the human genome encodes approximately 1500 proteins  
68 that can associate with RNA (Gerstberger et al., 2014). Only some of the RBPs are thought to  
69 be sequence specific. Many RNA-binding proteins bind only a single RNA species (e.g.  
70 ribosomal proteins), or serve a structural role in ribonucleoprotein complexes or the  
71 spliceosome. As RNA can fold to complex three-dimensional structures, defining what  
72 constitutes an RBP is not simple. In this work, we have focused on RBPs that are likely to  
73 bind to short sequence elements analogously to sequence-specific DNA binding transcription  
74 factors. The number of such RBPs can be estimated based on the number of proteins  
75 containing one or more canonical RNA-binding protein domains. The total number is likely  
76 to be ~400 RBPs (Cook et al., 2011; Ray et al., 2013). The major families of RBPs contain  
77 canonical RNA-binding protein domains (RBDs) such as the RNA recognition motif (RRM),  
78 CCCH zinc finger, K homology (KH) and cold shock domain (CSD). In addition, smaller  
79 number of proteins bind RNA using La, HEXIM, PUF, THUMP, YTH, SAM and TRIM-NHL  
80 domains. In addition, many “non-canonical” RBPs that do not contain any of the currently  
81 known RBDs have been reported to specifically to RNA (see, for example (Gerstberger et al.,  
82 2014)).

83 Various methods have been developed to determine the binding positions and  
84 specificities of RNA binding proteins. Methods that use crosslinking of RNA to proteins  
85 followed by immunoprecipitation and then massively parallel sequencing (CLIP-seq or HITS-  
86 CLIP, reviewed in (Darnell, 2010) and PAR-CLIP (Hafner et al., 2010) can determine RNA  
87 positions bound by RBPs *in vivo*, whereas other methods such as SELEX (Tuerk and Gold,  
88 1990), RNA bind-N-seq (Lambert et al., 2015) and RNAcompete (Ray et al., 2009) can  
89 determine motifs bound by RBPs *in vitro*. Most high-resolution models derived to date have  
90 been determined using RNAcompete, where microarrays are used to generate a library of  
91 RNA-molecules containing all possible 7-base long subsequences in at least 256

92 oligonucleotides, and the desired RBP is then used to select its target sites followed by  
93 detection of the bound sites using a second microarray. RNAcompete has been used to  
94 analyze large numbers of RBPs from multiple species including generation of PWMs for 75  
95 human RBPs (Ray et al., 2013).

96 The CISBP-RNA database (Ray et al., 2013) (Database Build 0.6) currently lists total  
97 of 392 high-confidence RBPs in human, but contains high-resolution specificity models for  
98 only 100 of them (Ray et al., 2013). In addition, a literature curation based database RBPDB  
99 (Cook et al., 2011) contains experimental data for 133 human RBPs, but mostly contains  
100 individual target- or consensus sites, and only has high resolution models for 39 RBPs. Thus,  
101 despite the central importance of RBPs in fundamental cellular processes, the precise  
102 sequence elements bound by most RBPs remain to be determined. To address this problem,  
103 we have in this work developed high-throughput RNA SELEX (HTR-SELEX) and used it to  
104 determine binding specificities of human RNA binding proteins. Our analysis suggests that  
105 many RBPs prefer to bind structured RNA motifs, and can associate with several distinct  
106 sequences. The distribution of motif matches in the genome indicates that many RBPs have  
107 central roles in regulation of RNA metabolism and activity in cells.

108  
109

## 110 RESULTS

111

112

### 113 Identification of RNA-binding motifs using HTR-SELEX

114

115 To identify binding specificities of human RBPs, we established a collection of  
116 canonical and non-canonical full-length RBPs and RNA binding domains. The full-length  
117 constructs representing 819 putative RBPs were picked from the Orfeome 3.1 and 8.1  
118 collections (Lamesch et al., 2007) based on annotations of the CisBP database for  
119 conventional RBPs (Ray et al., 2013) and Gerstberger et al. (Gerstberger et al., 2014) to  
120 include additional unconventional RBPs. The 293 constructs designed to cover all canonical  
121 RBDs within 156 human RBPs were synthesized based on Interpro defined protein domain  
122 calls from ENSEMBL v76. Most RBD constructs contained all RBDs of a given protein with 15  
123 amino-acids of flanking sequence (see **Table S1** for details). Constructs containing subsets  
124 of RBDs were also analyzed for some very large RBPs. Taken together our clone collection  
125 covered 942 distinct proteins. The RBPs were expressed in *E.coli* as fusion proteins with  
126 thioredoxin, incorporating an N-terminal hexahistidine and a C-terminal SBP tag (Jolma et  
127 al., 2015).

128 To identify RNA sequences that bind to the proteins, we subjected the proteins to  
129 HTR-SELEX (**Figure 1A**). In HTR-SELEX, a 40 bp random DNA sequence containing a sample  
130 index and 5' and 3' primer binding sequences is transcribed into RNA using T7 RNA  
131 polymerase, and incubated with the individual proteins in the presence of RNase inhibitors,  
132 followed by capture of the proteins using metal-affinity resin. After washing and RNA  
133 recovery, a DNA primer is annealed to the RNA, followed by amplification of the bound  
134 sequences using a reverse-transcription polymerase chain reaction (RT-PCR) using primers  
135 that regenerate the T7 RNA polymerase promoter. The entire process is repeated up to a  
136 total of four selection cycles. The amplified DNA is then sequenced, followed by identification  
137 of motifs using the Autoseed pipeline (Nitta et al., 2015) modified to analyze only the  
138 transcribed strand. Compared to previous methods such as RNAcompete, HTR-SELEX uses a  
139 selection library with very high sequence complexity, allowing identification of long RNA  
140 binding preferences.

141 The analysis resulted in generation of 145 binding specificity models for 86 RBPs.  
142 Most of the results (66 RBPs) were replicated in a second HTR-SELEX experiment. The  
143 success rate of our experiments was ~ 22% for the canonical RBPs, whereas the fraction of  
144 the successful non-canonical RBPs was much lower (~ 1.3%; **Table S1**). Comparison of our  
145 data with a previous dataset generated using RNAcompete (Ray et al., 2013) and to older  
146 data that has been compiled in the RBPDB-database (Cook et al., 2011) revealed that the  
147 specificities were generally consistent with the previous findings (**Figure S1**). HTR-SELEX  
148 resulted in generation of a larger number of motifs than the previous systematic studies, and  
149 revealed the specificities of 49 RBPs whose high-resolution specificity was not previously  
150 known (**Figure 1B**). Median coverage per RBD family was 24 % (**Figure 1C**). Compared to  
151 the motifs from previous studies, the motifs generated with HTR-SELEX were also wider, and  
152 had a higher information content (**Figure S2**), most likely due to the fact that the sequences  
153 are selected from a more complex library in HTR-SELEX (see also (Yin et al., 2017)). The  
154 median width and information contents of the models were 10 bases and 10 bits,  
155 respectively.

156  
157  
158  
159  
160  
161  
162  
163  
164  
165  
166  
167  
168  
169  
170  
171  
172  
173  
174  
175  
176  
177  
178  
179  
180  
181  
182  
183  
184  
185  
186  
187  
188  
189  
190  
191  
192  
193  
194  
195  
196  
197  
198  
199  
200  
201

## Some RBPs bind to RNA as dimers or multimers

Analysis of enriched sequences revealed that 31% of RBPs could bind to a site containing a direct repeat of the same sequence (**Figure S3**), suggesting that some RBPs were homodimers, or interacted to form a homodimer when bound to the RNA. In these cases, the gap between the repeats was generally short, with a median gap of 5 nucleotides (**Figure S3**). To determine whether the HTR-SELEX identified gap length preferences were also observed in sites bound *in vivo*, we compared our data against existing *in vivo* data for five RBPs for which high quality PAR-CLIP and HITS-CLIP derived data was available from previous studies (Farazi et al., 2014; Hafner et al., 2010; Weyn-Vanhentenryck et al., 2014), and found that preferred spacing identified in HTR-SELEX was in most cases also observed in the *in vivo* data (**Figure S4**).

## Recognition of RNA structures by RBPs

Unlike double-stranded DNA, whose structure is relatively independent of sequence, RNA folds into complex, highly sequence-dependent three dimensional structures. To analyze whether RBP binding depends on RNA secondary structure, we identified characteristic patterns of dsRNA formation by identifying correlations between all two base positions either within the motif or in its flanking regions, using a measure described in Nitta et al., (Nitta et al., 2015) that determines how much the observed count of combinations of a given set of two bases deviate from expected count based on independence of the positions (**Figure 2A**). The vast majority of the observed deviations from the independence assumption were consistent with the formation of an RNA stem-loop structure (example in **Figure 2B**). In addition, we identified one RBP, LARP6, that bound to a predicted internal loop embedded in a double-stranded RNA stem (**Figure 2C, Figure S5**). This binding specificity is consistent with the earlier observation that LARP6 binds to stem-loops with internal loops found in mRNAs encoding the collagen proteins COL1A1, COL1A2 and COL3A1 (Cai et al., 2010) (**Figure S5**).

In total, 69% (59 of 86) of RBPs recognized linear sequence motifs that did not appear to have a preference for a specific RNA secondary structure. The remaining 31% (27 of 86) of RBPs could bind at least one structured motif (**Figure 2D**); this group included several known structure-specific RBPs, such as RC3H1, RC3H2 (Leppek et al., 2013), RBMY1E, RBMY1F, RBMY1J (Skrisovska et al., 2007) and HNRNPA1 (Chen et al., 2016; Orenstein et al., 2018). A total of 15 RBPs bound exclusively to structured motifs, whereas 12 RBPs could bind to both structured and unstructured motifs. The median length of the stem region observed in all motifs was 5 bp, and the loops were between 3 and 15 bases long, with a median length of 11 (**Figure 2E**). Of the RBP families, KH and HEXIM motifs we found were linear, whereas some proteins from RRM, CSD, Zinc finger and LA-domain families could bind to both structured and unstructured sites (**Figure S6**).

To model RBP binding to stem-loop structures, we developed a simple stem-loop model (SLM; **Figure 2B**). This model describes the loop as a position independent model (PWM), and the stem by a nucleotide pair model where the frequency of each combination of two bases at the paired positions is recorded. In addition, we developed two different



202 visualizations of the model, a T-shaped motif that describes the mononucleotide distribution  
203 for the whole model, and the frequency of each set of bases at the paired positions by  
204 thickness of edges between the bases (**Figure 3**), and a simple shaded PWM where the stem  
205 part is indicated by a gray background where the darkness of the background indicates the  
206 fraction of bases that pair with each other using Watson-Crick or G:U base pairs (**Figure 3**).  
207 On average, the SLM increased the information content of the motifs by 4.2 bits (**Figure S7**).  
208 As expected from the correlation structure, a more detailed analysis of the number of paired  
209 bases within 10 bp from the seed sequence of MKRN1 revealed that >80% of individual  
210 sequence reads had more than four paired bases, compared to ~15% for the control RBP  
211 (ZRANB2) for which a structured motif was not identified.

212

213

## 214 **Classification of RBP motifs**

215 To analyze the motif collection globally, we developed PWM and SLM models for all  
216 RBPs. To compare the motifs, we determined their similarity using SSTAT. To simplify the  
217 analysis, the PWM models were used for this comparison even for factors that bound to the  
218 structured motifs. We then used the dominating set method (Jolma et al., 2013) to identify  
219 distinctly different motifs (**Figure S8**). Comparison of the motifs revealed that in general, the  
220 specificities of evolutionarily related RBPs were similar (**Figure 5** and **Figure S8**). For the  
221 largest RRM family, the 96 members were represented by 47 specificity classes, whereas the  
222 smaller classes such as CCCH, KH, CSD, and HEXIM were represented by 9, 10, 6 and 1 motifs,  
223 representing 17, 11, 7 and 2 different specificities, respectively (**Figure S8**).

224 Analysis of the dinucleotide content of all motifs revealed unexpected differences in  
225 occurrence of distinct dinucleotides within the PWMs. The dinucleotides GG, GU, UG and UU  
226 were far more common than other dinucleotides (**Figure 4G**; fold change 2.75;  $p < 0.00225$ ;  
227 t-test). This suggests that G and U bases are most commonly bound by RBPs. This effect was  
228 not due to the presence of stem structures in the motifs, as the unstructured motifs were also  
229 enriched in G and U. The masking of G and U bases by protein binding may assist in folding  
230 of RNA to defined structures, as G and U bases have lower specificity in pairing compared to  
231 C and A, due to the presence of the G:U base pair in RNA.

232 Most RBPs bound to only one motif. However, 41 RBPs could bind to multiple  
233 different sites (**Figure 5**). In five cases, the differences between the primary and secondary  
234 motif could be explained by a difference in spacing between the two half-sites. In 12 cases,  
235 one of the motifs was structured, and the other linear. In addition, in eight RBPs the primary  
236 and secondary motifs represented two different structured motifs, where the loop length or  
237 the loop sequence varied (**Figure 5**). In addition, for four RBPs, we recovered more than two  
238 different motifs. The most complex binding specificity we identified belonged to LARP6  
239 (**Figure 5 and S9**), which could bind to multiple simple linear motifs, multiple dimeric motifs,  
240 and the internal loop-structure described above.

241

242

## 243 **Conservation and occurrence of motif matches**

244

245 We next analyzed the enrichment of the motif occurrences in different classes of  
246 human transcripts. The normalized density of motifs for each factor at both strands of DNA

247 was evaluated for transcription start sites (TSSs), splice donor and acceptor sites, and  
248 translational start and stop positions (see **Supplementary Data S1** for full data). This  
249 analysis revealed that many RBP recognition motifs were enriched at splice junctions. The  
250 most enriched linear motif in splice donor sites was ZRANB2, a known regulator of  
251 alternative splicing (**Figure 6A**) (Loughlin et al., 2009). Analysis of matches to structured  
252 motifs revealed even stronger enrichment of motifs for ZC3H12A, B and C to splice donor  
253 sites (**Figure 6A**). These results suggest a novel role for ZC3H12 proteins in regulation of  
254 splicing. The motifs for both ZRANB2 and ZC3H12 protein factors were similar but not  
255 identical to the canonical splice donor consensus sequence (ag | GURagu) that is recognized  
256 by the spliceosome, suggesting that these proteins may act by masking a subset of splice  
257 donor sites.

258 Analysis of splice acceptor sites also revealed that motifs for known components of  
259 the spliceosome, such as RBM28 (Damianov et al., 2006), were enriched in introns and  
260 depleted in exons. Several motifs were also enriched at the splice junction, including the  
261 known regulators of splicing IGF2BP1 and ZFR (**Supplementary Data S1**) (Haque et al.,  
262 2018; Huang et al., 2018). In addition, we found several motifs that mapped to the 5' of the  
263 splice junction, including some known splicing factors such as QKI (Hayakawa-Yano et al.,  
264 2017) and ELAVL1 (Bakheet et al., 2018), and some factors such as DAZL, CELF1 and BOLL  
265 for which a role in splicing has to our knowledge not been reported (**Figure 6A** and  
266 **Supplementary Data S1**) (Rosario et al., 2017; Xia et al., 2017).

267 To determine whether the identified binding motifs for RBPs are biologically  
268 important, we analyzed the conservation of the motif matches in mammalian genomic  
269 sequences close to splice junctions. This analysis revealed strong conservation of several  
270 classes of motifs in the transcripts (**Figure 6B**), indicating that many of the genomic  
271 sequences matching the motifs are under purifying selection.

272 Both matches to ZRANB2 and ZC3H12 motifs were also enriched in 5' regions of  
273 transcripts, but not in anti-sense transcripts originating from promoters (**Figure 6C**),  
274 suggesting that these motifs also have a role in differentiating between sense and anti-sense  
275 transcripts of mRNAs.

276 To identify biological roles of the motifs, we also used Gene Ontology Enrichment  
277 analysis to identify motifs that were enriched in specific types of mRNAs. This analysis  
278 revealed that many RBP motifs are specifically enriched in particular classes of transcripts.  
279 For example, we found that MEX3B motifs were enriched in genes involved in type I  
280 interferon-mediated signaling pathway (**Figure 6D**). Taken together, our analysis indicates  
281 that RBP motifs are biologically relevant, as matches to the motifs are conserved, and occur  
282 specifically in genomic features and in transcripts having specific biological roles.

283  
284  
285  
286

## 287 DISCUSSION

288

289 In this work, we have determined the RNA-binding specificities of a large collection  
290 of human RNA-binding proteins. The tested proteins included both proteins with canonical  
291 RNA binding domains and putative RBPs identified experimentally (Gerstberger et al., 2014;  
292 Ray et al., 2013). The method used for analysis involved selection of RNA ligands from a  
293 collection of random 40 nucleotide sequences. Compared to previous analyses of RNA-  
294 binding proteins, the HTR-SELEX method allows identification of structured motifs, and  
295 motifs that are relatively high in information content. The method can identify simple  
296 sequence motifs or structured RNAs, provided that their information content is less than ~40  
297 bits. However, due to the limit on information content, and requirement of relatively high-  
298 affinity binding, the method does not generally identify highly structured RNAs that in  
299 principle could bind to almost any protein. Consistent with this, most binding models that  
300 we could identify were for proteins containing canonical RBPs.

301 Motifs were identified for a total of 86 RBPs. Interestingly, a large fraction of all RBPs  
302 (47%) could bind to multiple distinctly different motifs. The fraction is much higher than  
303 that observed for double-stranded DNA binding transcription factors, suggesting that  
304 sequence recognition and/or individual binding domain arrangement on single-stranded  
305 RNA can be more flexible than on dsDNA. Analysis of the mononucleotide content of all the  
306 models also revealed a striking bias towards recognition of G and U over C and A. This may  
307 reflect the fact that formation of RNA structures is largely based on base pairing, and that G  
308 and U are less specific in their base pairings than C and A. Thus, RBPs that mask G and U bases  
309 increase the overall specificity of RNA folding in cells.

310 Similar to proteins, depending on sequence, single-stranded nucleic acids may fold  
311 into complex and stable structures, or remain largely disordered. Most RBPs preferred short  
312 linear RNA motifs, suggesting that they recognize RNA motifs found in unstructured or  
313 single-stranded regions. However, approximately 31% of all RBPs preferred at least one  
314 structured motif. The vast majority of the structures that they recognized were simple stem-  
315 loops, with relatively short stems, and loops of 3-15 bases. Most of the base specificity of the  
316 motifs was found in the loop region, with only one or few positions in the stem displaying  
317 specificity beyond that caused by the paired bases. This is consistent with the structure of  
318 fully-paired double-stranded RNA where base pair edge hydrogen-bonding information is  
319 largely inaccessible in the deep and narrow major groove. In addition, we identified one RBP  
320 that bound to a more complex structure. LARP6 recognized an internal loop structure where  
321 two base-paired regions were linked by an uneven number of unpaired bases.

322 Compared to TFs, which display complex dimerization patterns when bound to DNA,  
323 RBPs displayed simpler dimer spacing patterns. This is likely due to the fact that the  
324 backbone of a single-stranded nucleic acid has rotatable bonds. Thus, cooperativity between  
325 two RBDs requires that they bind to relatively closely spaced motifs.

326 Analysis of the biological roles of the RBP motif matches indicated that many motif  
327 matches were conserved, and specifically located at genomic features such as splice  
328 junctions. In particular, our analysis suggested a new role for ZC3H12, BOLL and DAZL  
329 proteins in regulating alternative splicing, and MEX3B in binding to type I interferon-  
330 regulated genes. As a large number of novel motifs were generated in the study, we expect  
331 that many other RBPs will have specific roles in particular biological functions.



332           Our results represent the largest single systematic study of human RNA-binding  
333 proteins to date. This class of proteins is known to have major roles in RNA metabolism,  
334 splicing and gene expression. However, the precise roles of RBPs in these biological  
335 processes are poorly understood, and in general the field has been severely understudied.  
336 The generated resource will greatly facilitate research in this important area.

337

338

## 339 MATERIALS AND METHODS

340

341

### 342 Clone collection, cloning and protein production

343

344

345 Clones were either collected from the human Orfeome 3.1 and 8.1 clone libraries (full  
346 length clones) or ordered as synthetic genes from Genscript (eRBP constructs). As in our  
347 previous work (Jolma et al., 2013), protein-coding synthetic genes or full length ORFs were  
348 cloned into pETG20A-SBP to create an *E.coli* expression vector that allows the RBP or RBD  
349 cDNAs to be fused N-terminally to Thioredoxin+6XHis and C-terminally to SBP-tags. Fusion  
350 proteins were then expressed in the Rosetta P3 DE LysS *E.coli* strain (Novagen) using an  
351 autoinduction protocol (Jolma et al., 2015). All constructs described in **Table S1** were  
352 expressed and subjected to HTR-SELEX, regardless of protein level expressed. Protein  
353 production was assessed in parallel by 96-well SDS-PAGE (ePage, Invitrogen). The success  
354 rate of protein production was dependent on the size of the proteins, with most small RBDs  
355 expressing well in *E.coli*. Significantly lower yield of protein was observed for full-length  
356 proteins larger than 50 kDa.

357 After HIS-tag based IMAC purification, glycerol was added to a final concentration of  
358 10%. Samples were split to single-use aliquots with approximately 200 ng RBP in a 5 $\mu$ l  
359 volume and frozen at -80°C.

360

361

### 361 Selection library generation

362

363 To produce a library of RNA sequences for selection (selection ligands), we first  
364 constructed dsDNA templates by combining three oligonucleotides together in a three cycle  
365 PCR reaction (Phusion, NEB). For information about the barcoded ligand design, see **Table**  
366 **S1**. The ligand design was similar to that used in our previous work analyzing TF binding  
367 specificities in dsDNA (Jolma et al., 2013) except for the addition of a T7 RNA polymerase  
368 promoter in the constant flanking regions of the ligand. RNA was expressed from the DNA-  
369 templates using T7 *in vitro* transcription (Ampliscribe T7 High Yield Transcription Kit,  
370 Epicentre or Megascript-kit Ambion) according to manufacturer's instructions, after which  
371 the DNA-template was digested using RNase-free DNaseI (Epicentre) or the TURBO-DNase  
372 supplied with the Megascript-kit. All RNA-production steps included RiboGuard RNase-  
373 inhibitor (Epicentre).

374 Two different approaches were used to facilitate the folding of RNA molecules. In the  
375 protocol used in experiments where the batch identifier starts with letters "EM", RNA-  
376 ligands were heated to +70°C followed by gradual, slow cooling to allow the RNA to fold into  
377 minimal energy structures, whereas in batches "AAG" and "AAH" RNA transcription was not  
378 followed by such folding protocol. The rationale was that spontaneous co-transcriptional  
379 RNA-folding may better reflect folded RNA structures in the *in vivo* context. In almost all of  
380 the cases where the same RBPs were tested with both of the protocols the results were highly  
381 similar.

382

383

## 384 HTR-SELEX assay

385

386 Selection reactions were performed as follows: ~200ng of RBP was mixed on ice with  
387 ~1 $\mu$ g of the RNA selection ligands to yield approximate 1:5 molar ratio of protein to ligand  
388 in 20 $\mu$ l of Promega buffer (50 mM NaCl, 1 mM MgCl<sub>2</sub>, 0.5 mM Na<sub>2</sub>EDTA and 4% glycerol in  
389 50 mM Tris-Cl, pH 7.5). The complexity of the initial DNA library is approximately 10<sup>12</sup> DNA  
390 molecules with 40 bp random sequence (~20 molecules of each 20 bp sequence on the top  
391 strand). The upper limit of detection of sequence features of HTR-SELEX is thus around 40  
392 bits of information content.

393 The reaction was incubated for 15 minutes at +37°C followed by additional 15  
394 minutes at room temperature in 96-well microwell plates (4-titude, USA), after which the  
395 reaction was combined with 50  $\mu$ l of 1:50 diluted paramagnetic HIS-tag beads (His Mag  
396 Sepharose excel, GE-Healthcare) that had been blocked and equilibrated into the binding  
397 buffer supplemented with 0.1% Tween 20 and 0.1 $\mu$ g/ $\mu$ l of BSA (Molecular Biology Grade,  
398 NEB). Protein-RNA complexes were then incubated with the magnetic beads on a shaker for  
399 further two hours, after which the unbound ligands were separated from the bound beads  
400 through washing with a Biotek 405CW plate washer fitted with a magnetic platform. After  
401 the washes, the beads were suspended in heat elution buffer (0.5  $\mu$ M RT-primer, 1 mM EDTA  
402 and 0.1% Tween20 in 10 mM Tris-Cl buffer, pH 7) and heated for 5 minutes at 70°C followed  
403 by cooling on ice to denature the proteins and anneal the reverse transcription primer to the  
404 recovered RNA library, followed by reverse transcription and PCR amplification of the  
405 ligands. The efficiency of the selection process was evaluated by running a qPCR reaction on  
406 parallel with the standard PCR reaction.

407

408

## 409 Sequencing and generation of motifs

410

411 PCR products from RNA libraries (indexed by bar-codes) were pooled together,  
412 purified using a PCR-purification kit (Qiagen) and sequenced using Illumina HiSeq 2000 (55  
413 bp single reads). Data was de-multiplexed, and initial data analysis performed using the  
414 Autoseed algorithm (Nitta et al., 2015) that was further adapted to RNA analysis by taking  
415 into account only the transcribed strand and designating uracil rather than thymine.  
416 Autoseed identifies gapped and ungapped kmers that represent local maximal counts  
417 relative to similar sequences within their Huddinge neighborhood (Nitta et al., 2015). It then  
418 generates a draft motif using each such kmer as a seed. This initial set of motifs is then refined  
419 manually to identify the final seeds (**Table S2**), to remove artifacts due to selection  
420 bottlenecks and common “aptamer” motifs that are enriched by the HTR-SELEX process  
421 itself, and motifs that are very similar to each other. To assess initial data, we compared the  
422 deduced motifs to known motifs, to replicate experiments and experiments performed with  
423 paralogous proteins. Individual results that were not supported by replicate or prior  
424 experimental data were deemed inconclusive and were not included in the final dataset.  
425 Draft models were manually curated (AJ, JT, QM, TRH) to identify successful experiments,  
426 and final models were generated using the seeds indicated in **Table S2**.

427 Autoseed detected more than one seed for many RBPs. Up to four seeds were used to  
428 generate a maximum of two unstructured and two structured motifs. Of these, the motif with  
429 largest number of seed matches using the multinomial setting indicated on **Table S2** was

430 designated the primary motif. The motif with the second largest number of matches was  
431 designated the secondary motif. The counts of the motifs represent the prevalence of the  
432 corresponding motifs in the sequence pool (**Table S2**). Only these primary and secondary  
433 motifs were included in further analyses. Such additional motifs are shown for LARP6 in **Fig.**  
434 **S9**.

435 To find RBPs that bind to dimeric motifs, we visually examined the PWMs to find  
436 direct repeat pattern of three or more base positions, with or without a gap between them  
437 (see **Table S2**). The presence of such repetitive pattern could be either due to dimeric  
438 binding, or the presence of two RBDs that bind to similar sequences in the same protein.

439 To identify structured motifs, we visually investigated the correlation diagrams for  
440 each seed to find motifs that displayed the diagonal pattern evident in **Figure 2B**. The plots  
441 display effect size and maximal sampling error, and show the deviation of nucleotide pair  
442 distribution from what is expected from the distribution of the individual nucleotides. For  
443 each structured motif, SLM models (**Table S3**) were built from sequences matching the  
444 indicated seeds; a multinomial 2 setting was used to prevent the paired bases from  
445 influencing each other. Specifically, when the number of occurrence of each pair of bases was  
446 counted at the base-paired positions, neither of the paired bases was used to identify the  
447 sequences that were analyzed. The SLMs were visualized either as the T-shaped logo (**Figure**  
448 **3**) or as a PWM type logo where the bases that constitute the stem were shaded based on the  
449 total fraction of A:U, G:C and G:U base pairs.

450 For analysis of RNA structure in **Figures 2** and **S5**, sequences matching the regular  
451 expression NNNNCAGU[17N]AGGCNNN or sequences of the three human collagen gene  
452 transcripts (From 5' untranslated and the beginning the coding sequence, the start codon is  
453 marked with bold typeface: COL1A1 -CCACAAAGAGUCUACAUGUCUAGGGUCUAG-  
454 ACAUGUUCAGCUUUGUGG; COL1A2- CACAAGGAGUCUGCAUGUCUAAGUGCUAGA-  
455 CAUGCUCAGCUUUGUG and COL3A1 - CCACAAAGAGUCUACAUGGGUCAUGUUCAG-  
456 CUUUGUGG) were analysed using "RNAstructure" software (Mathews, 2014) through the  
457 web-interface

458 in:<http://rna.urmc.rochester.edu/RNAstructureWeb/Servers/Fold/Fold.html> using default  
459 settings. All structures are based on the program's minimum energy structure prediction.  
460 For analysis in **Figure 3**, we extracted all sequences that matched the binding sequences of  
461 MKRN1 and ZRANB2 (GUAAAKUGUAG and NNNGGUAAGGUNN, respectively; N denotes a  
462 weakly specified base) flanked with ten bases on both sides from the cycle four of HTR-  
463 SELEX. Subsequently, we predicted their secondary structures using the program RNAfold  
464 (Vienna RNA package; (Lorenz et al., 2011)) followed by counting the predicted secondary  
465 structure at each base position in the best reported model for each sequence. For both RBPs,  
466 the most common secondary structure for the bases within the defined part of the consensus  
467 (GUAAAKUGUAG and GGUAAGGU) was the fully single stranded state (82% and 30% of all  
468 predicted structures, respectively). To estimate the secondary structure at the flanks, the  
469 number of paired bases formed between the two flanks were identified for each sequence.  
470 Fraction of sequences with specific number of paired bases are shown in **Figure 3**.

471  
472  
473  
474  
475

## 476 **Motif mapping**

477

478 To gain insight into the function of the RBPs, we mapped each motif to the whole  
479 human genome (hg38). We applied different strategies for the linear and the stem-loop  
480 motifs. For the linear motifs, we identified the motif matches with MOODS (Korhonen et al.,  
481 2017) with the following parameter setting: --best-hits 300000 --no-snps. For the stem-loop  
482 motifs, we implemented a novel method to score sequences against the SLMs. The source  
483 code is available on GitHub: <https://github.com/zhjilin/rmap>.

484 We identified the 300,000 best scored matches in the genome, and further included  
485 any matches that had the same score as the match with the lowest score, leading to at least  
486 300,000 matches for each motif. The matches were then intersected with the annotated  
487 features from the ENSEMBL database (hg38, version 91), including the splicing donor  
488 (DONOR), splicing acceptor (ACCEPTOR), the translation start codon (STARTcodon), the  
489 translation stop codon (STOPcodon) and the transcription starting site (TSS). The above  
490 features were filtered in order to remove short introns (<50bp), and features with non-intact  
491 or non-canonical start codon or stop codon. The filtered features were further extended 1kb  
492 both upstream and downstream in order to place the feature in the centre of all the intervals.  
493 The motif matches overlapping the features were counted using BEDTOOLS (version 2.15.0)  
494 and normalized by the total number of genomic matches for the corresponding motif.

495

496

## 497 **Motif comparisons and GO analysis**

498

499 To assess the similarity between publicly available motifs and our HTR-SELEX data,  
500 we aligned the motifs as described in (Jolma et al., 2015) (**Figure S1**). To determine whether  
501 RBPs with similar RBDs recognize and bind to similar targets, we compared the sequences  
502 of the RBDs and their motifs. First, the RBPs were classified based on the type and number  
503 of RBDs. For each class, we then extracted the amino-acid sequence of the RBPs starting from  
504 the first amino acid of the first RBD and ending at the last amino acid of the last RBD. We also  
505 confirmed the annotation of the RBDs by querying each amino acid sequence against that  
506 SMART database, and annotated the exact coordinates of the domains through the web-tools:  
507 <http://smart.embl-heidelberg.de> and <http://smart.embl-heidelberg.de/smart/batch.pl>.  
508 Sequence similarities and trees were built using PRANK (Loytynoja and Goldman, 2005)  
509 (parameters: -d, -o, -showtree). The structure of the tree representing the similarity of the  
510 domain sequence was visualized using R (version 3.3.1).

511 For identification of classes of transcripts that are enriched in motif matches for each  
512 RBP, we extracted the top 100 transcripts according to the score density of each RBP motif.  
513 These 100 transcripts were compared to the whole transcriptome to conduct the GO  
514 enrichment analysis for each motif using the R package ClusterProfiler (version 3.0.5).

515 To analyze conservation of motif matches, sites recognized by each motif were  
516 searched from both strands of 100 bp windows centered at the features of interest (acceptor,  
517 donor sites) using the MOODS program (version 1.0.2.1). For each motif and feature type,  
518 1000 highest affinity sites were selected for further analysis regardless of the matching  
519 strand. Whether the evolutionary conservation of the high affinity sites was explained by the  
520 motifs was tested using program SiPhy (version 0.5, task 16, seedMinScore 0) and  
521 multiz100way multiple alignments of 99 vertebrate species to human (downloaded from



522 UCSC genome browser, version hg38). A site was marked as being conserved according to  
523 the motif if its SiPhy score was positive meaning that the aligned bases at the site were better  
524 explained by the motif than by a neutral evolutionary model (hg38.phastCons100way.mod  
525 obtained from UCSC genome browser). Two motifs were excluded from the analysis because  
526 the number of high affinity sites that could be evaluated by SiPhy was too small. The  
527 hypothesis that the motif sites in the sense strand were more likely to be conserved than  
528 sites in the antisense strand was tested against the null hypothesis that there was no  
529 association between site strand and conservation using Fisher's exact test (one-sided). The  
530 P values given by the tests for individual motifs were corrected for multiple testing using  
531 Holm's method.

532

533

### 534 **Mutual information calculation**

535

536 The global pattern of motifs across the features tested was analyzed by calculating  
537 the mutual information (MI) between 3-mer distributions at two non-overlapping positions  
538 of the aligned RNA sequences. MI can be used for such analysis, because if a binding event  
539 contacts two continuous or spaced 3-bp wide positions of the sequences at the same time,  
540 the 3-mer distributions at these two positions will be correlated. Such biased joint  
541 distribution can then be detected as an increase in MI between the positions.

542 Specifically, MI between two non-overlapping positions (pos1, pos2) was estimated  
543 using the observed frequencies of a 3-mer pair (3+3-mer), and of its constituent 3-mers at  
544 both positions:

$$MI(pos1, pos2) = \sum P(3+3\text{-mer}) \log_2 \frac{P(3+3\text{-mer})}{P_{pos1}(3\text{-mer})P_{pos2}(3\text{-mer})}$$

545 where  $P(3+3\text{-mer})$  is the observed probability of the 3-mer pair (i.e. gapped or ungapped 6  
546 mer).  $P_{pos1}(3\text{-mer})$  and  $P_{pos2}(3\text{-mer})$ , respectively, are the marginal probabilities of the  
547 constitutive 3-mers at position 1 and position 2. The sum is over all possible 3-mer pairs.

548 To focus on RBPs that specifically bind to a few closely related sequences, such as  
549 RBPs with well-defined motifs, it is possible to filter out most background non-specific  
550 bindings (e.g., selection on the shape of RNA backbone) by restricting the MI calculation, to  
551 consider only the most enriched 3-mer pairs for each two non-overlapping positions.

552 Such enriched 3-mer pair based mutual information (E-MI) is calculated by summing  
553 MI over top-10 most enriched 3-mer pairs.

554

$$E\text{-MI}(pos1, pos2) = \sum_{top\ 3+3\text{-mers}} P(3+3\text{-mer}) \log_2 \frac{P(3+3\text{-mer})}{P_{pos1}(3\text{-mer})P_{pos2}(3\text{-mer})}$$

555

556

557

558

559

## 560 **FIGURE LEGENDS**

561

### 562 **Figure 1. RNA HT-SELEX protocol and data-analysis**

563 (A) Schematic illustration of the HTR-SELEX process. RBD or full-length RBPs expressed in  
564 *E.coli* as HIS<sub>6</sub>-tagged fusion proteins (left top) were purified and incubated with barcoded  
565 RNA selection ligands. RNA ligands bound by the proteins were recovered by RT-PCR,  
566 followed by *in vitro* transcription to generate the RNA for the next cycle of SELEX (left  
567 middle). The procedure was repeated at least three times and the ligands recovered from the  
568 selection cycles were subjected to Illumina sequencing (left bottom) with data analysis to  
569 generate binding specificity models (right).

570 (B) Comparison of the number of RBPs with motifs derived in the present study (HTR-SELEX)  
571 and two previous studies (RNAcompete (Cook et al., 2011) and SELEX (Ray et al., 2013)).  
572 Note that our analysis revealed motifs for 49 RBPs for which a motif was not known.

573 (C) Distribution of RBP with motifs classified by structural family of the RBDs.

574

### 575 **Figure 2. Detection of RNA binding models**

576 (A) ZRANB2 binds to a linear RNA motif. The motif of ZRANB2 is shown below the triangular  
577 correlation heatmap. The heatmap illustrates deviation of the observed nucleotide  
578 distributions from those predicted by a mononucleotide model where bases are independent.

579 (B) MKRN1 binds preferentially to a stem-loop. Note a diagonal series of red tiles (boxed)  
580 that indicates pairs of bases whose distribution deviates from the independence assumption.  
581 These bases are shaded in the motif below the triangle. The interdependency occurs between  
582 bases that are at the same distance from the center of the motif, consistent with formation of  
583 a stem-loop structure. Right top: A RNAfold-predicted stem-loop structure for a sequence  
584 that was highly enriched in the experiment.

585 (C) LARP6 binds to a complex, bulged RNA structure. The left panel indicates the  
586 dinucleotide dependencies, whereas the right panel presents a predicted structure of the  
587 bound RNA.

588 (D) Fraction of RBPs with linear and structured binding specificities.

589 (E) Length distribution of stem and loop for the structured motifs.

590

### 591 **Figure 3. Comparison between linear PWM and stem loop (SLM) models.**

592 Left: Visualization of the stem loop models. A T-shape model (top) shows a horizontal loop  
593 and a vertical stem where the frequency of each base combination is shown. Bases are  
594 aligned so that Watson-Crick base pairs orient horizontally. Pie-charts show frequency of  
595 Watson-Crick (green) and G-U (light green) at each position of the predicted stem. A linear  
596 visualization (bottom) where the base pairing frequency is indicated by the darkness of gray  
597 shading is also shown.

598 Middle: Schematic description of the scoring process for the SLM. All possible alignment  
599 positions between an 8-mer with a 4 base gap in the middle and the model are searched in  
600 order to find the aligned position with the best score. When the 8-mer overlaps both bases  
601 of a SLM-predicted base-pair, the score for the paired position (red tiles connected by black  
602 lines) is derived from the SLM base-pair score. In cases where the kmer aligns to only one  
603 base of the SLM base-pair, the score for the position (black) is derived from the  
604 mononucleotide matrix.

605 Right: RNA secondary structure prediction analysis using RNAfold reveals that sequences  
606 flanking MKRN1 loop sequence form base pairs (top), whereas bases on the flanks of  
607 ZRANB2 matches (bottom) are mostly unpaired.

608

#### 609 **Figure 4. Comparison between the obtained motifs**

610 (A to H) Similar RBPs bind to similar motifs. Motifs were classified into six major categories  
611 based on structural class of the RBPs. Dendrograms are based on amino-acid alignment using  
612 PRANK. Within RRM family, RBPs with a distinct number of RRMs were grouped and aligned  
613 separately. Motifs shown are the primary motif for each RBP. Asterisks indicate a stem-loop  
614 structured motif, with the gray shading showing the strength of the base pairing at the  
615 corresponding position. Two asterisks indicate that the RBP can bind to a structured  
616 secondary motif. Only families with more than one representative RHT-SELEX motif are  
617 shown.

618 (G) RBPs commonly prefer sequences with G or U nucleotides. Frequencies of all  
619 mononucleotides (left) and dinucleotides (right) across all of the RBP motifs. Note that G and  
620 U are overrepresented.

621

#### 622 **Figure 5. Many RBPs can recognize more than one motif**

623 Pie chart (top) indicates fraction of RBPs that recognize more than one motif. Primary (left)  
624 and secondary (right) motifs are shown, classified according to the RBP structural family.  
625 Right column indicates whether the RBP binds to two linear motifs (+), two structured motifs  
626 (red circle) or both types of motifs (green circle).

627

#### 628 **Figure 6. RBP motif matches are conserved and enriched in distinct sequence features**

629 (A) Strong enrichment of RBP motif matches at or near the splicing donor and acceptor sites.  
630 Mononucleotide frequencies at splice donor and acceptor sites are shown on top, above the  
631 gene schematic. Left: meta-plots indicate the enrichment of ZRANB2 and ZC3H12C motif  
632 matches at splice donor sites. Right: enrichment of BOLL and DAZL at splice acceptor sites.  
633 Blue dots indicate the number of matches in the sense strand at each base position; black  
634 line indicates the median in 10 base sliding windows. Corresponding values for the anti-  
635 sense strand are shown as light blue dots and dotted black line, respectively.

636 (B) The conservation of motif binding sites in sense vs. antisense strand. For each feature  
637 type (acceptor, donor site) and binding motif, thousand highest affinity sites in total were  
638 selected from the hundred base windows centered at the features. The total number the  
639 conserved sites (x-axis) is plotted against odds ratio of conserved vs. non-conserved site  
640 being in sense strand (y-axis). Those motifs for which conservation was significantly  
641 associated with sense strand (one-sided Fisher's exact test) are shown in green. The five  
642 motifs with smallest p-values are named.

643 (C) Enrichment of ZRANB2 and ZC3H12C motif matches near transcription start sites (TSS).  
644 Note that matches are only enriched on the sense strand downstream of the TSS.

645 (D) Gene Ontology enrichment of MEX3B motif matches. The top 100 genes with highest  
646 motif-matching score density were used to conduct the Gene Ontology enrichment analysis.  
647 The enriched GO terms were simplified by their similarity (cutoff=0.5). The fraction of genes  
648 in the GO categories is also shown (Gene Ratio).

649

650

651 **Supplementary information**

652

653 **Figure S1. The similarity of motifs between HTR-SELEX and the curated dataset.** In total,  
654 33 motifs from the CISBP-RNA database (RNAcompete) were collected to compare with the  
655 HTR-SELEX derived motifs (both primary and secondary motifs). Motifs were presented and  
656 organized according to their protein structure family by descending similarity score. Higher  
657 score indicates higher similarity between motifs.

658

659 **Figure S2. Information content and width distribution of HTR-SELEX motifs.** The per-  
660 base information was calculated for every individual position in the PWM. The overall  
661 information content of each motif is the sum of all positions in the PWM. The width of each  
662 motif was generated by counting the number of position in the corresponding PWM.

663

664 **Figure S3. RBPs with multimeric binding sites.** Some RBPs (31.3%, left) bind to the  
665 sequence as homodimers. Two identical half-sites are separated by a spacing sequence. The  
666 distribution of spacing preference of all RBPs is shown (right).

667

668 **Figure S4. Spacing preferences between dimeric binding sites are consistent in**  
669 **different assays.** For four RBPs, the same seeds were used in different assays to detect the  
670 spacing preferences. The colour-coded arrays represent the spacing information extracted  
671 from HTR-SELEX, PAR-CLIP and HITS-CLIP. The results are consistent between HTR-SELEX  
672 (top row) and PAR-CLIP (bottom row). Pie charts show the percentage of reads containing  
673 the indicated instances of the motifs CAC in RBPMS binding motifs as determined by HTR-  
674 SELEX (left) or PAR-CLIP (middle). Incidence of the motif CCA is also shown (right).

675

676 **Figure S5. Known binding motifs of LARP6.** The left three structures were generated using  
677 the sequences enriched in HTR-SELEX. The right three structures illustrate the predicted  
678 structures of known collagen RNA sequences.

679

680 **Figure S6. RBP families with and without structural specificity.** The count of RBPs  
681 recognizing structured and unstructured binding motifs in each protein structure family.

682

683 **Figure S7. Information content correlation between the SLM and the mono-nucleotide**  
684 **PWM. Left. Information content correlation per base. Right. Overall information**  
685 **content correlation.** In general, the SLM yielded higher per-base information content.

686

687 **Figure S8. Dominating set of HTR-SELEX motifs.** Cystoscope (Version 3.2.1) was used to  
688 visualize the dominating set on top of the relationship map between motifs with a cutoff of  
689  $5e-6$ , calculated by SSTAT (see the method part).

690

691 **Figure S9. Various binding specificities detected in LARP6.** LARP6 is able to recognise  
692 and bind to distinct sequences through different strategies besides binding to the internal  
693 loop structure. (A) Short and long linear motifs (B) unstructured motifs with gaps.

694

695 **Figure S10. The mutual information (MI) meta-plots around the splicing donor and**  
696 **acceptor sites.** The splice donor and acceptor sites are placed in the centre of the 147nts  
697 sequence. The detected signals close to the donor and acceptor sites are shown in red.

698

699 **Table S1. Sequence information of proteins and DNA.**

700 **Table S2. PWMs of the linear motifs.**

701 **Table S3. PWMs of the structured motifs**

702 **Table S4. Dependency matrices of paired bases for the structured motifs.**

703

704 **Supplementary Data S1. Meta-plots of the motif matches enrichment at splice donor,**  
705 **acceptor, TSS, start and stop codon.**

706



707 **Reference**

- 708
- 709 Bakheet, T., Hitti, E., Al-Saif, M., Moghrabi, W.N., and Khabar, K.S.A. (2018). The AU-rich  
710 element landscape across human transcriptome reveals a large proportion in introns and  
711 regulation by ELAVL1/HuR. *Biochim Biophys Acta* 1861, 167-177.
- 712 Cai, L., Fritz, D., Stefanovic, L., and Stefanovic, B. (2010). Binding of LARP6 to the conserved  
713 5' stem-loop regulates translation of mRNAs encoding type I collagen. *J Mol Biol* 395, 309-  
714 326.
- 715 Chen, Y., Zubovic, L., Yang, F., Godin, K., Pavelitz, T., Castellanos, J., Macchi, P., and Varani, G.  
716 (2016). Rbfox proteins regulate microRNA biogenesis by sequence-specific binding to their  
717 precursors and target downstream Dicer. *Nucleic Acids Res* 44, 4381-4395.
- 718 Cook, K.B., Kazan, H., Zuberi, K., Morris, Q., and Hughes, T.R. (2011). RBPDB: a database of  
719 RNA-binding specificities. *Nucleic Acids Research* 39, D301-D308.
- 720 Damianov, A., Kann, M., Lane, W.S., and Bindereif, A. (2006). Human RBM28 protein is a  
721 specific nucleolar component of the spliceosomal snRNPs. *Biol Chem* 387, 1455-1460.
- 722 Darnell, R.B. (2010). HITS-CLIP: panoramic views of protein-RNA regulation in living cells.  
723 *Wiley interdisciplinary reviews RNA* 1, 266-286.
- 724 Farazi, T.A., Leonhardt, C.S., Mukherjee, N., Mihailovic, A., Li, S., Max, K.E., Meyer, C., Yamaji,  
725 M., Cekan, P., Jacobs, N.C., *et al.* (2014). Identification of the RNA recognition element of the  
726 RBPMS family of RNA-binding proteins and their transcriptome-wide mRNA targets. *RNA*  
727 (New York, NY) 20, 1090-1102.
- 728 Gerstberger, S., Hafner, M., and Tuschl, T. (2014). A census of human RNA-binding proteins.  
729 *Nature reviews Genetics* 15, 829-845.
- 730 Glisovic, T., Bachorik, J.L., Yong, J., and Dreyfuss, G. (2008). RNA-binding proteins and post-  
731 transcriptional gene regulation. *FEBS letters* 582, 1977-1986.
- 732 Hafner, M., Landthaler, M., Burger, L., Khorshid, M., Hausser, J., Berninger, P., Rothballer, A.,  
733 Ascano, M., Jr., Jungkamp, A.C., Munschauer, M., *et al.* (2010). Transcriptome-wide  
734 identification of RNA-binding protein and microRNA target sites by PAR-CLIP. *Cell* 141,  
735 129-141.
- 736 Haque, N., Ouda, R., Chen, C., Ozato, K., and Hogg, J.R. (2018). ZFR coordinates crosstalk  
737 between RNA decay and transcription in innate immunity. *Nat Commun* 9, 1145.
- 738 Hayakawa-Yano, Y., Suyama, S., Nogami, M., Yugami, M., Koya, I., Furukawa, T., Zhou, L., Abe,  
739 M., Sakimura, K., Takebayashi, H., *et al.* (2017). An RNA-binding protein, Qki5, regulates  
740 embryonic neural stem cells through pre-mRNA processing in cell adhesion signaling.  
741 *Genes Dev* 31, 1910-1925.
- 742 Huang, H., Weng, H., Sun, W., Qin, X., Shi, H., Wu, H., Zhao, B.S., Mesquita, A., Liu, C., Yuan,  
743 C.L., *et al.* (2018). Recognition of RNA N(6)-methyladenosine by IGF2BP proteins enhances  
744 mRNA stability and translation. *Nat Cell Biol* 20, 285-295.
- 745 Jolma, A., Yan, J., Whittington, T., Toivonen, J., Nitta, K.R., Rastas, P., Morgunova, E., Enge, M.,  
746 Taipale, M., Wei, G., *et al.* (2013). DNA-binding specificities of human transcription factors.  
747 *Cell* 152, 327-339.
- 748 Jolma, A., Yin, Y., Nitta, K.R., Dave, K., Popov, A., Taipale, M., Enge, M., Kivioja, T., Morgunova,  
749 E., and Taipale, J. (2015). DNA-dependent formation of transcription factor pairs alters  
750 their binding specificity. *Nature* 527, 384-388.
- 751 Korhonen, J.H., Palin, K., Taipale, J., and Ukkonen, E. (2017). Fast motif matching revisited:  
752 high-order PWMs, SNPs and indels. *Bioinformatics* 33, 514-521.

753 Lambert, N.J., Robertson, A.D., and Burge, C.B. (2015). RNA Bind-n-Seq: Measuring the  
754 Binding Affinity Landscape of RNA-Binding Proteins. *Methods in enzymology* 558, 465-493.  
755 Lamesch, P., Li, N., Milstein, S., Fan, C., Hao, T., Szabo, G., Hu, Z., Venkatesan, K., Bethel, G.,  
756 Martin, P., *et al.* (2007). hORFeome v3.1: a resource of human open reading frames  
757 representing over 10,000 human genes. *Genomics* 89, 307-315.  
758 Leppek, K., Schott, J., Reitter, S., Poetz, F., Hammond, M.C., and Stoecklin, G. (2013). Roquin  
759 promotes constitutive mRNA decay via a conserved class of stem-loop recognition motifs.  
760 *Cell* 153, 869-881.  
761 Lorenz, R., Bernhart, S.H., Honer Zu Siederdisen, C., Tafer, H., Flamm, C., Stadler, P.F., and  
762 Hofacker, I.L. (2011). ViennaRNA Package 2.0. *Algorithms Mol Biol* 6, 26.  
763 Loughlin, F.E., Mansfield, R.E., Vaz, P.M., McGrath, A.P., Setiyaputra, S., Gamsjaeger, R., Chen,  
764 E.S., Morris, B.J., Guss, J.M., and Mackay, J.P. (2009). The zinc fingers of the SR-like protein  
765 ZRANB2 are single-stranded RNA-binding domains that recognize 5' splice site-like  
766 sequences. *Proc Natl Acad Sci U S A* 106, 5581-5586.  
767 Loytynoja, A., and Goldman, N. (2005). An algorithm for progressive multiple alignment of  
768 sequences with insertions. *Proc Natl Acad Sci U S A* 102, 10557-10562.  
769 Mathews, D.H. (2014). RNA Secondary Structure Analysis Using RNAstructure. *Curr Protoc*  
770 *Bioinformatics* 46, 12 16 11-25.  
771 Nitta, K.R., Jolma, A., Yin, Y., Morgunova, E., Kivioja, T., Akhtar, J., Hens, K., Toivonen, J.,  
772 Deplancke, B., Furlong, E.E., *et al.* (2015). Conservation of transcription factor binding  
773 specificities across 600 million years of bilateria evolution. *Elife* 4.  
774 Orenstein, Y., Ohler, U., and Berger, B. (2018). Finding RNA structure in the unstructured  
775 RBPome. *BMC Genomics* 19, 154.  
776 Ray, D., Kazan, H., Chan, E.T., Pena Castillo, L., Chaudhry, S., Talukder, S., Blencowe, B.J.,  
777 Morris, Q., and Hughes, T.R. (2009). Rapid and systematic analysis of the RNA recognition  
778 specificities of RNA-binding proteins. *Nat Biotechnol* 27, 667-670.  
779 Ray, D., Kazan, H., Cook, K.B., Weirauch, M.T., Najafabadi, H.S., Li, X., Gueroussov, S., Albu, M.,  
780 Zheng, H., Yang, A., *et al.* (2013). A compendium of RNA-binding motifs for decoding gene  
781 regulation. *Nature* 499, 172-177.  
782 Rosario, R., Childs, A.J., and Anderson, R.A. (2017). RNA-binding proteins in human  
783 oogenesis: Balancing differentiation and self-renewal in the female fetal germline. *Stem Cell*  
784 *Res* 21, 193-201.  
785 Skrisovska, L., Bourgeois, C.F., Stefl, R., Grellscheid, S.N., Kister, L., Wenter, P., Elliott, D.J.,  
786 Stevenin, J., and Allain, F.H. (2007). The testis-specific human protein RBMY recognizes  
787 RNA through a novel mode of interaction. *EMBO Rep* 8, 372-379.  
788 Tuerk, C., and Gold, L. (1990). Systematic evolution of ligands by exponential enrichment:  
789 RNA ligands to bacteriophage T4 DNA polymerase. *Science (New York, NY)* 249, 505-510.  
790 Varani, G., and McClain, W.H. (2000). The G x U wobble base pair. A fundamental building  
791 block of RNA structure crucial to RNA function in diverse biological systems. *EMBO Rep* 1,  
792 18-23.  
793 Weyn-Vanhentenryck, S.M., Mele, A., Yan, Q., Sun, S., Farny, N., Zhang, Z., Xue, C., Herre, M.,  
794 Silver, P.A., Zhang, M.Q., *et al.* (2014). HITS-CLIP and integrative modeling define the Rbfox  
795 splicing-regulatory network linked to brain development and autism. *Cell reports* 6, 1139-  
796 1152.

797 Xia, H., Chen, D., Wu, Q., Wu, G., Zhou, Y., Zhang, Y., and Zhang, L. (2017). CELF1  
798 preferentially binds to exon-intron boundary and regulates alternative splicing in HeLa  
799 cells. *Biochim Biophys Acta* 1860, 911-921.  
800 Yin, Y., Morgunova, E., Jolma, A., Kaasinen, E., Sahu, B., Khund-Sayeed, S., Das, P.K., Kivioja,  
801 T., Dave, K., Zhong, F., *et al.* (2017). Impact of cytosine methylation on DNA binding  
802 specificities of human transcription factors. *Science* (New York, NY) 356.  
803

# Jolma et al. 2018 Figure 1

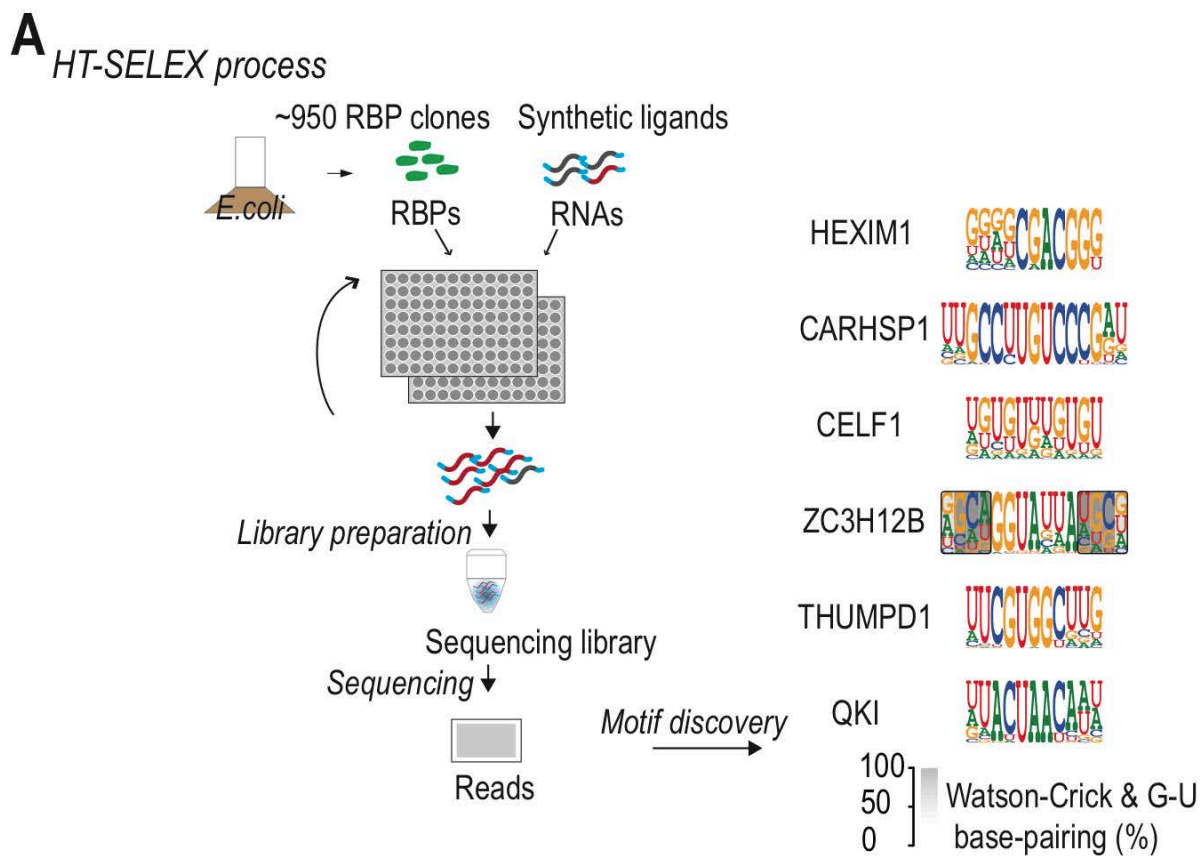

**B** *Comparison to other datasets*

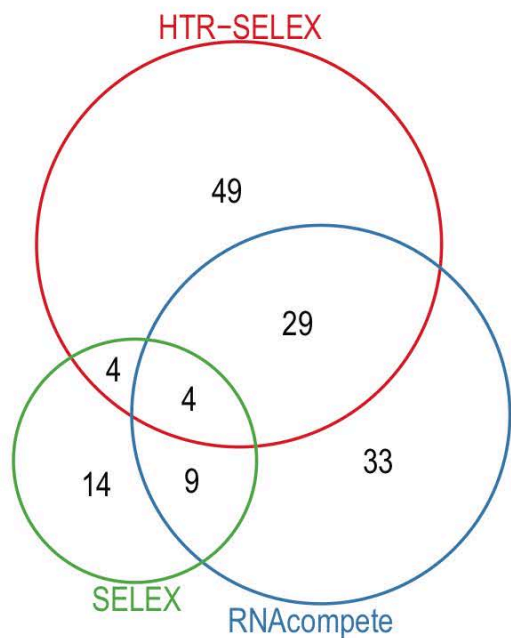

**C** *RBPs based on protein domain*

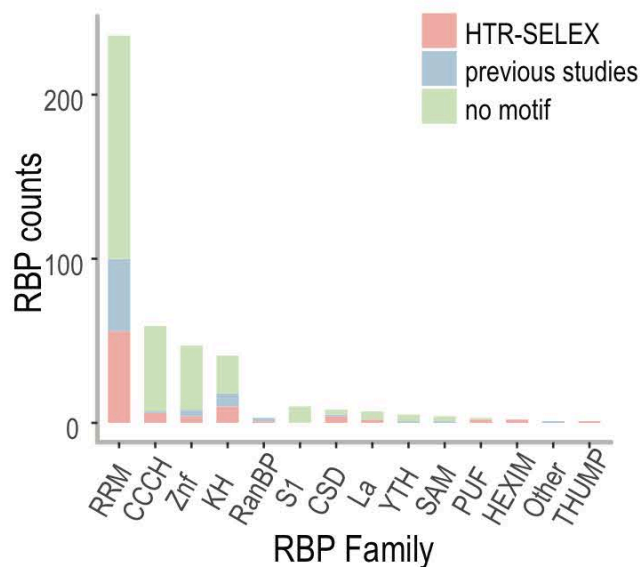



# Jolma et al. 2018 Figure 2

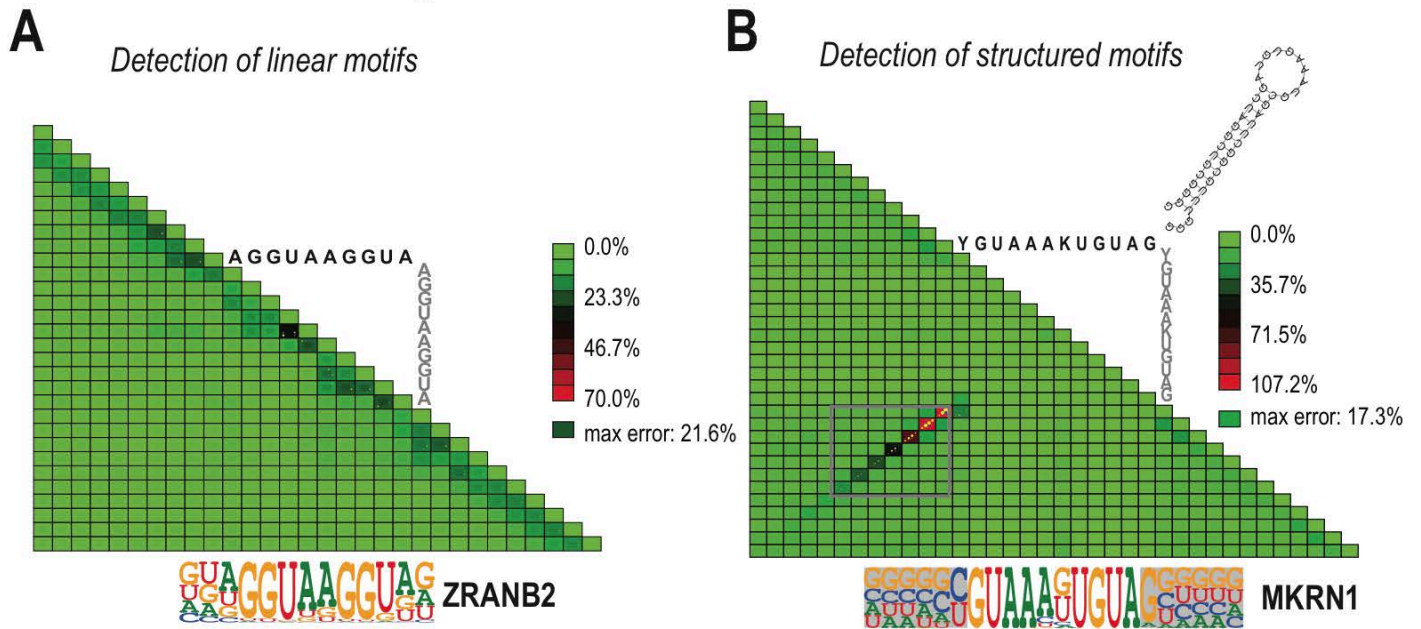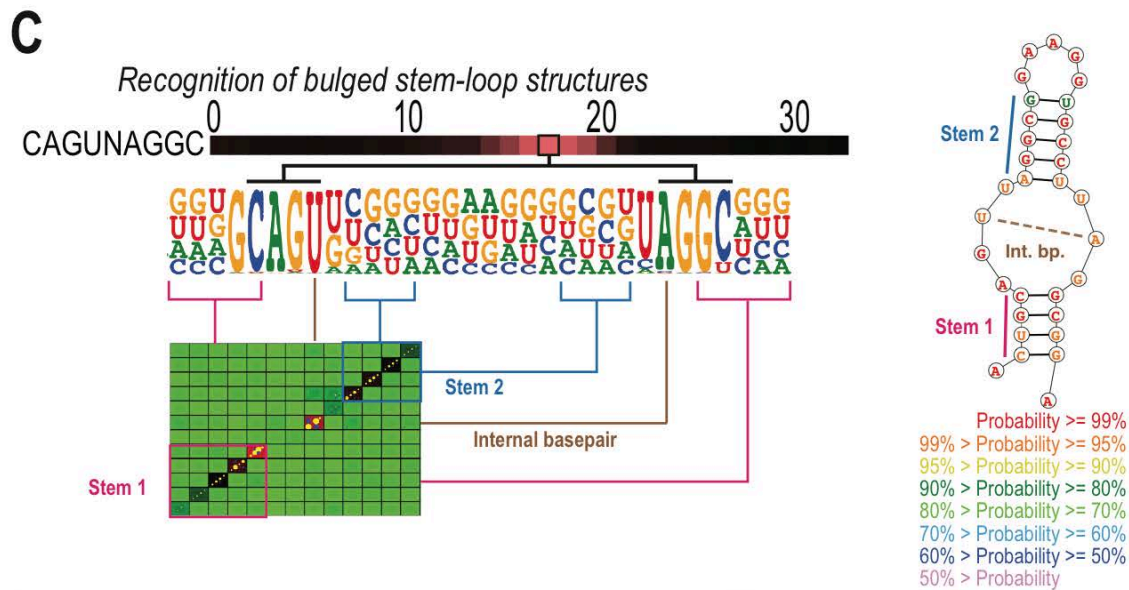

**D** *RBPs with structured motifs*

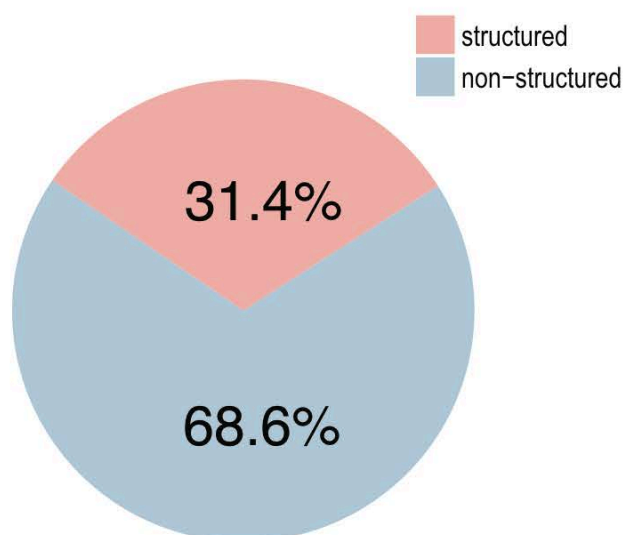

**E** *Length distribution of stem and loop*

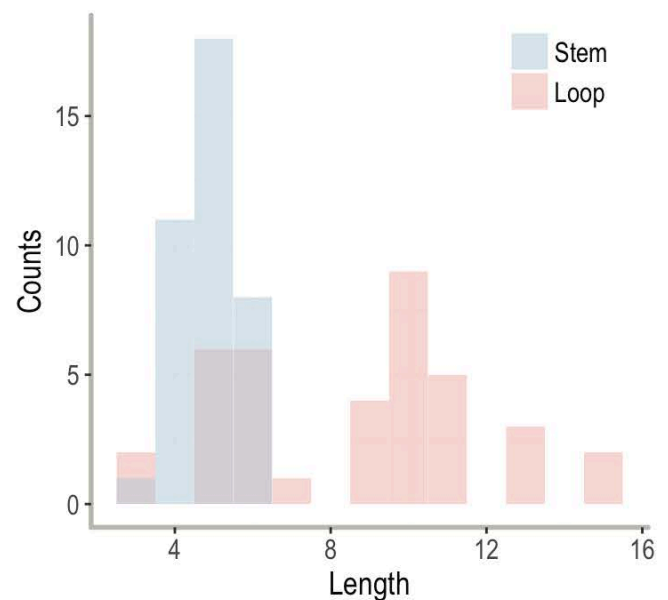



# Jolma et al. 2018 Figure 3

T shape illustration of stem-loop model

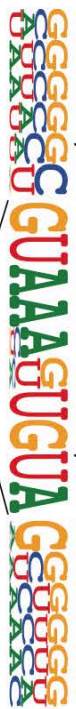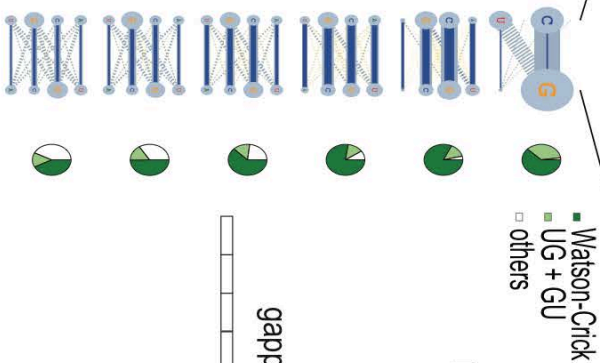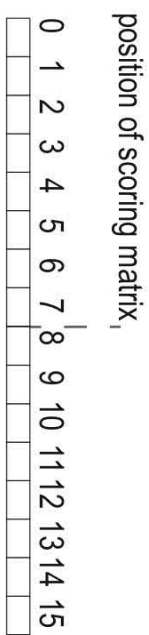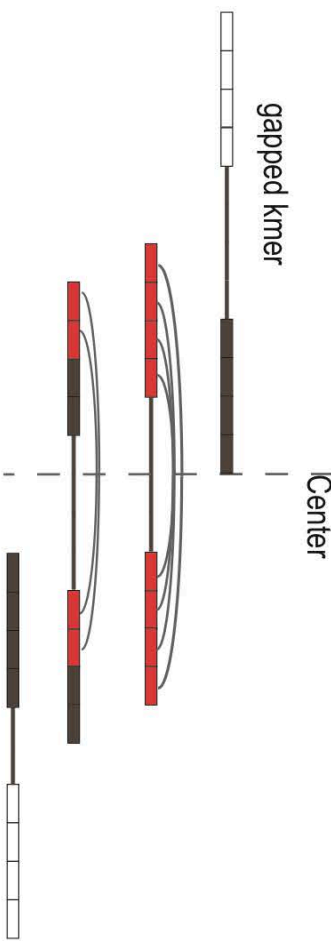

Motif with stem shaded

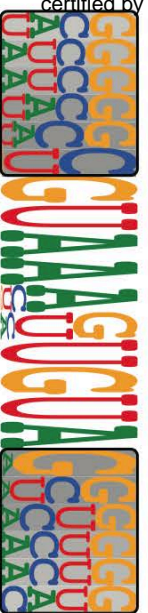

- █ base scored with mononucleotide matrix
- █ base scored with SLM base-pair score
- ▭ base without overlap with the score matrix
- gap in the kmer
- ⌒ indicates base-pair

**MKRN1**

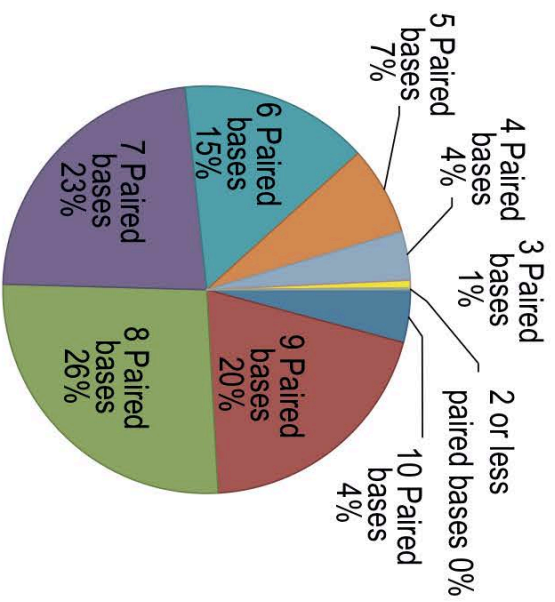

**ZRANB2**

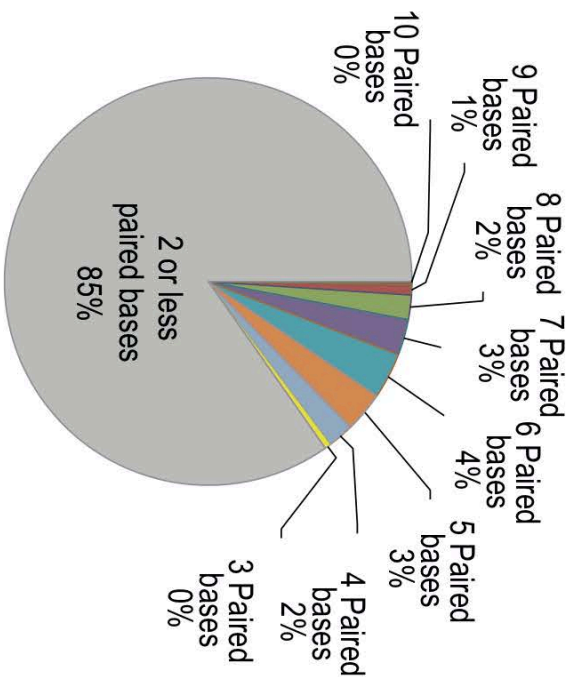

# Jolma et al. 2018 Figure 4

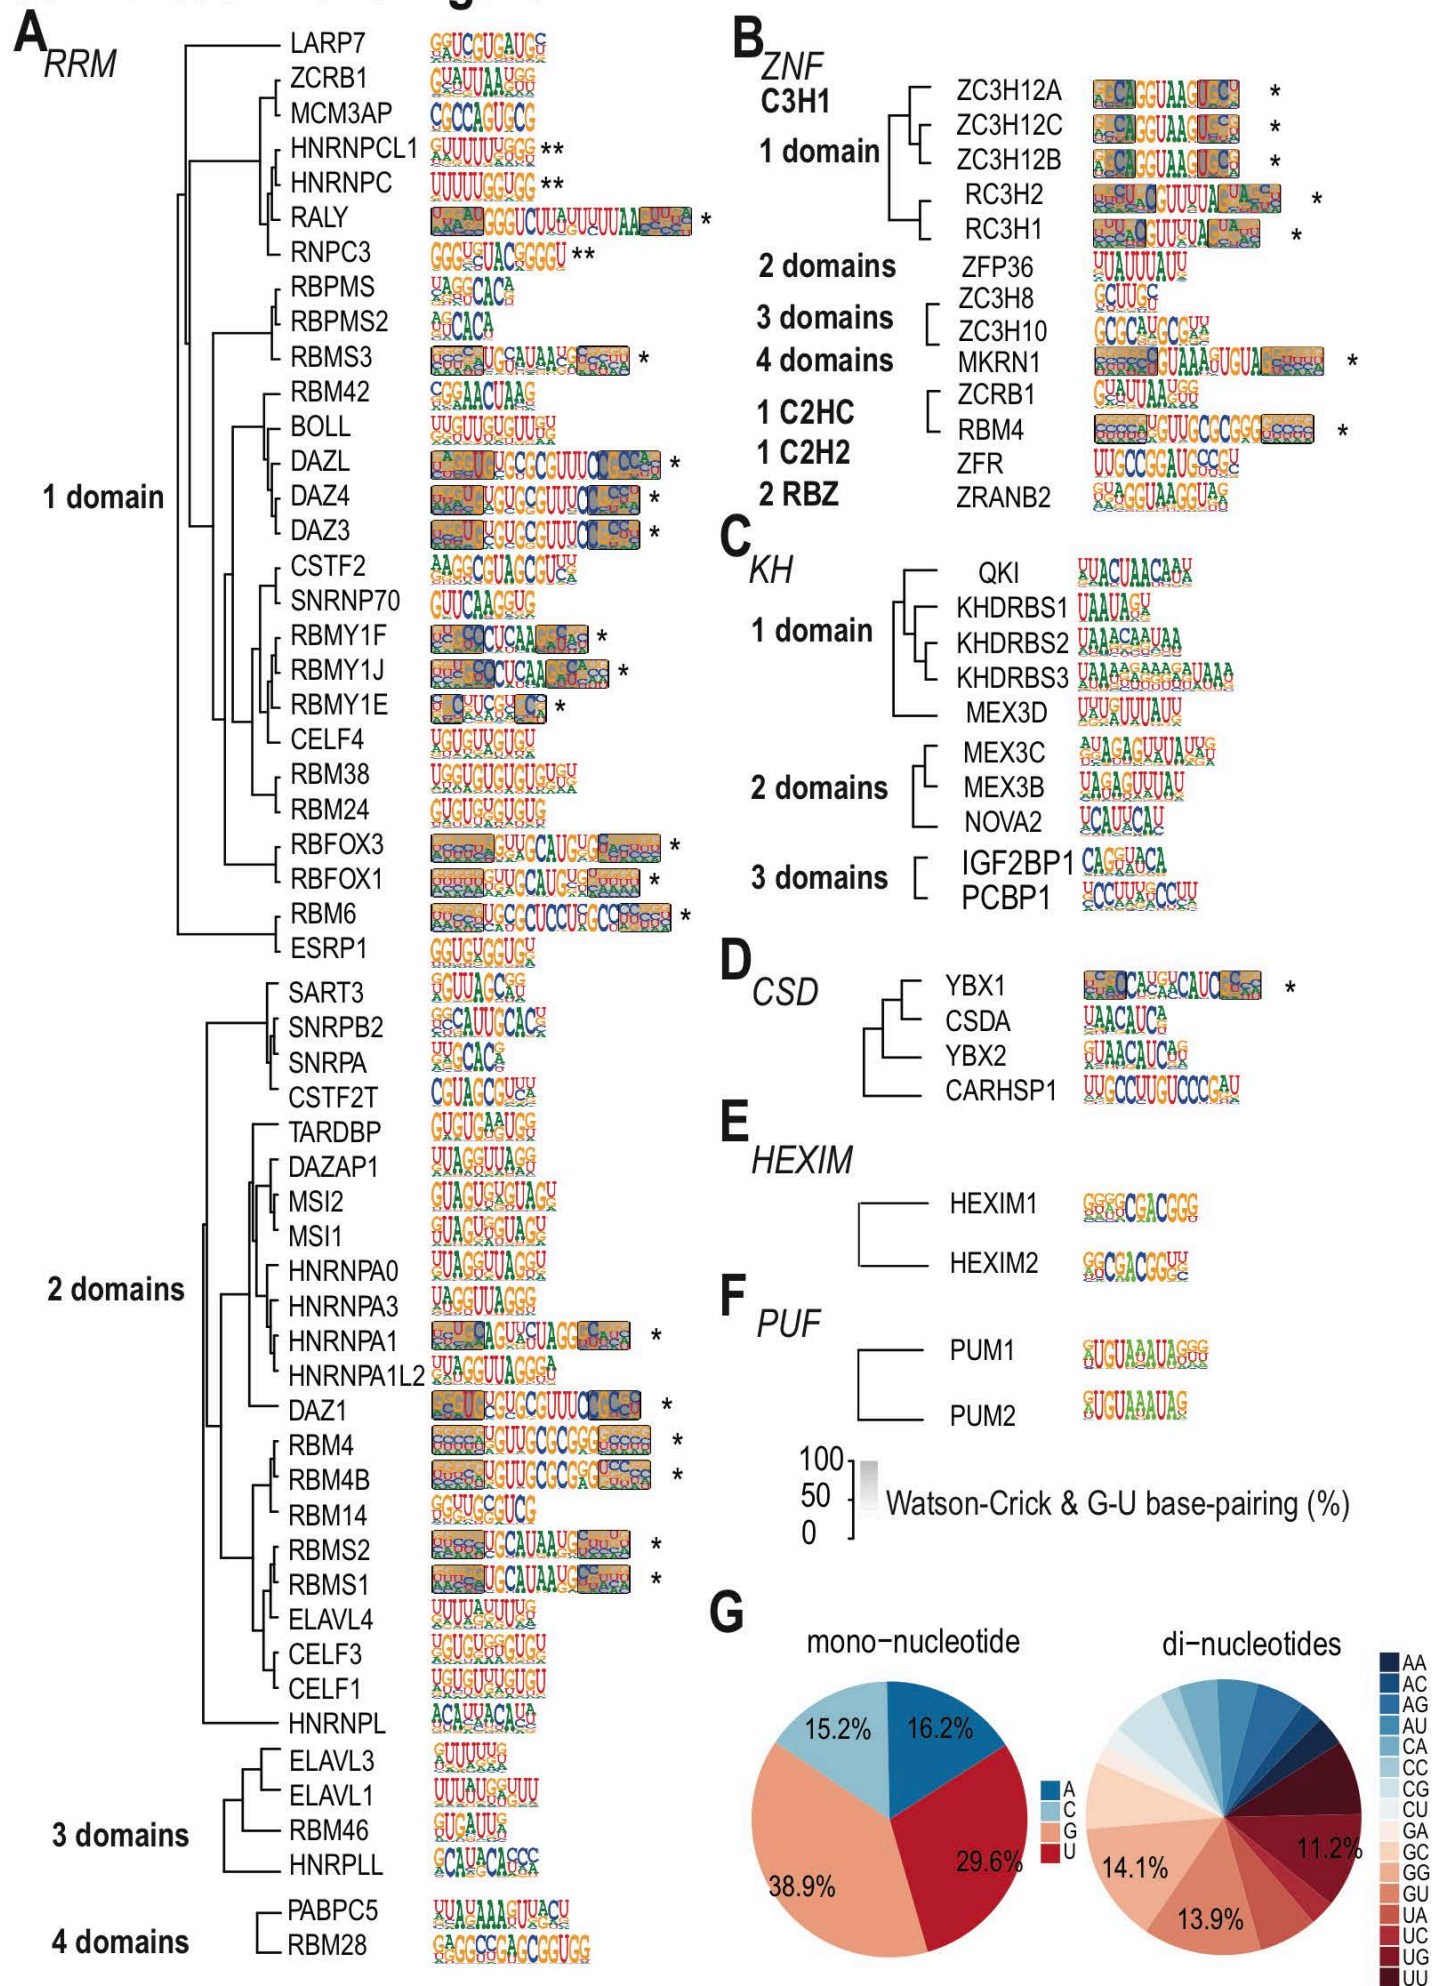



# Jolma et al. 2018 Figure 5

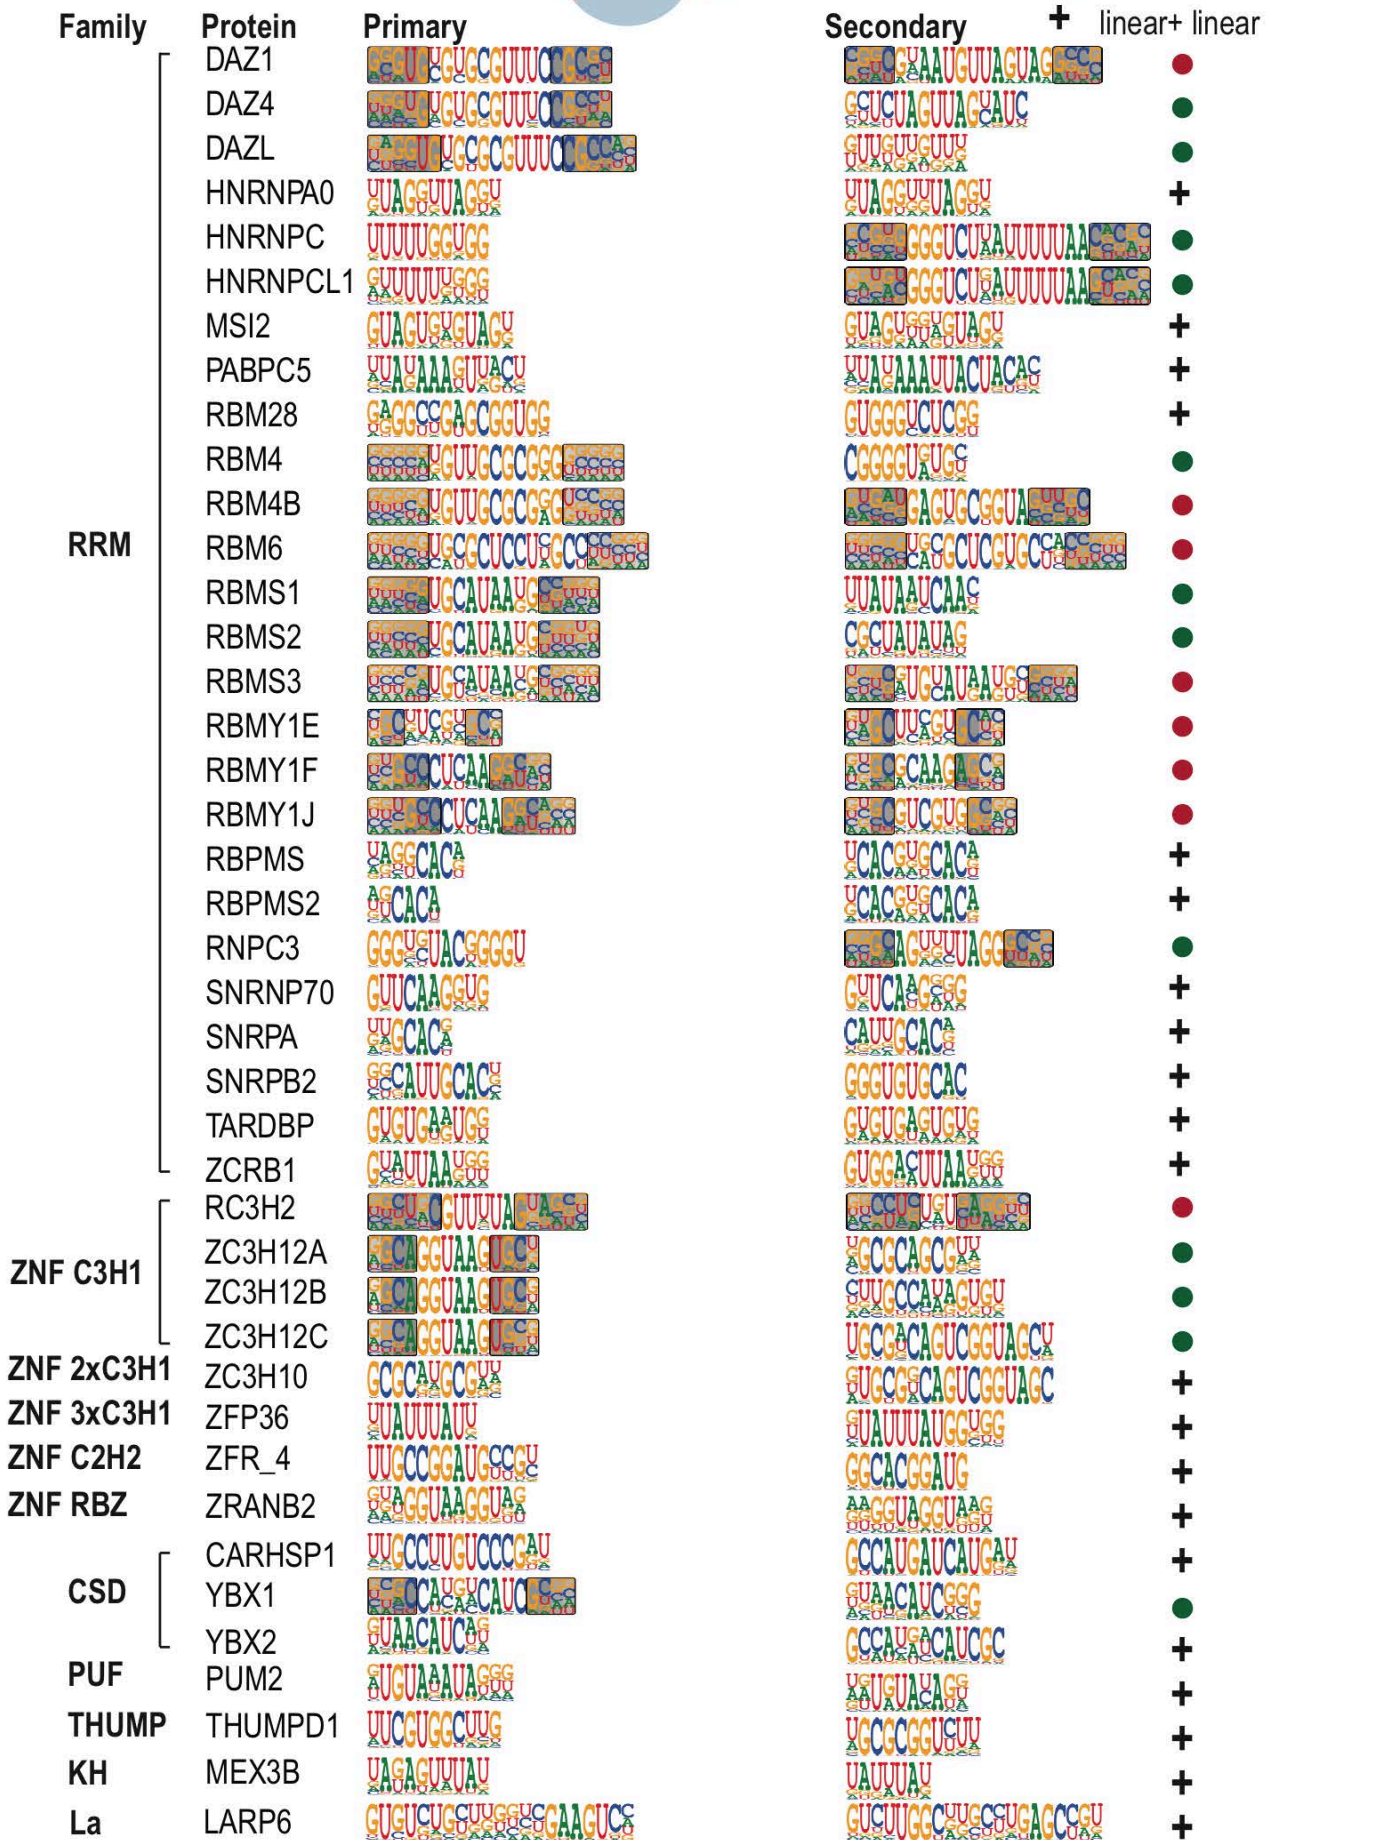

# Jolma et al. 2018 Figure 6

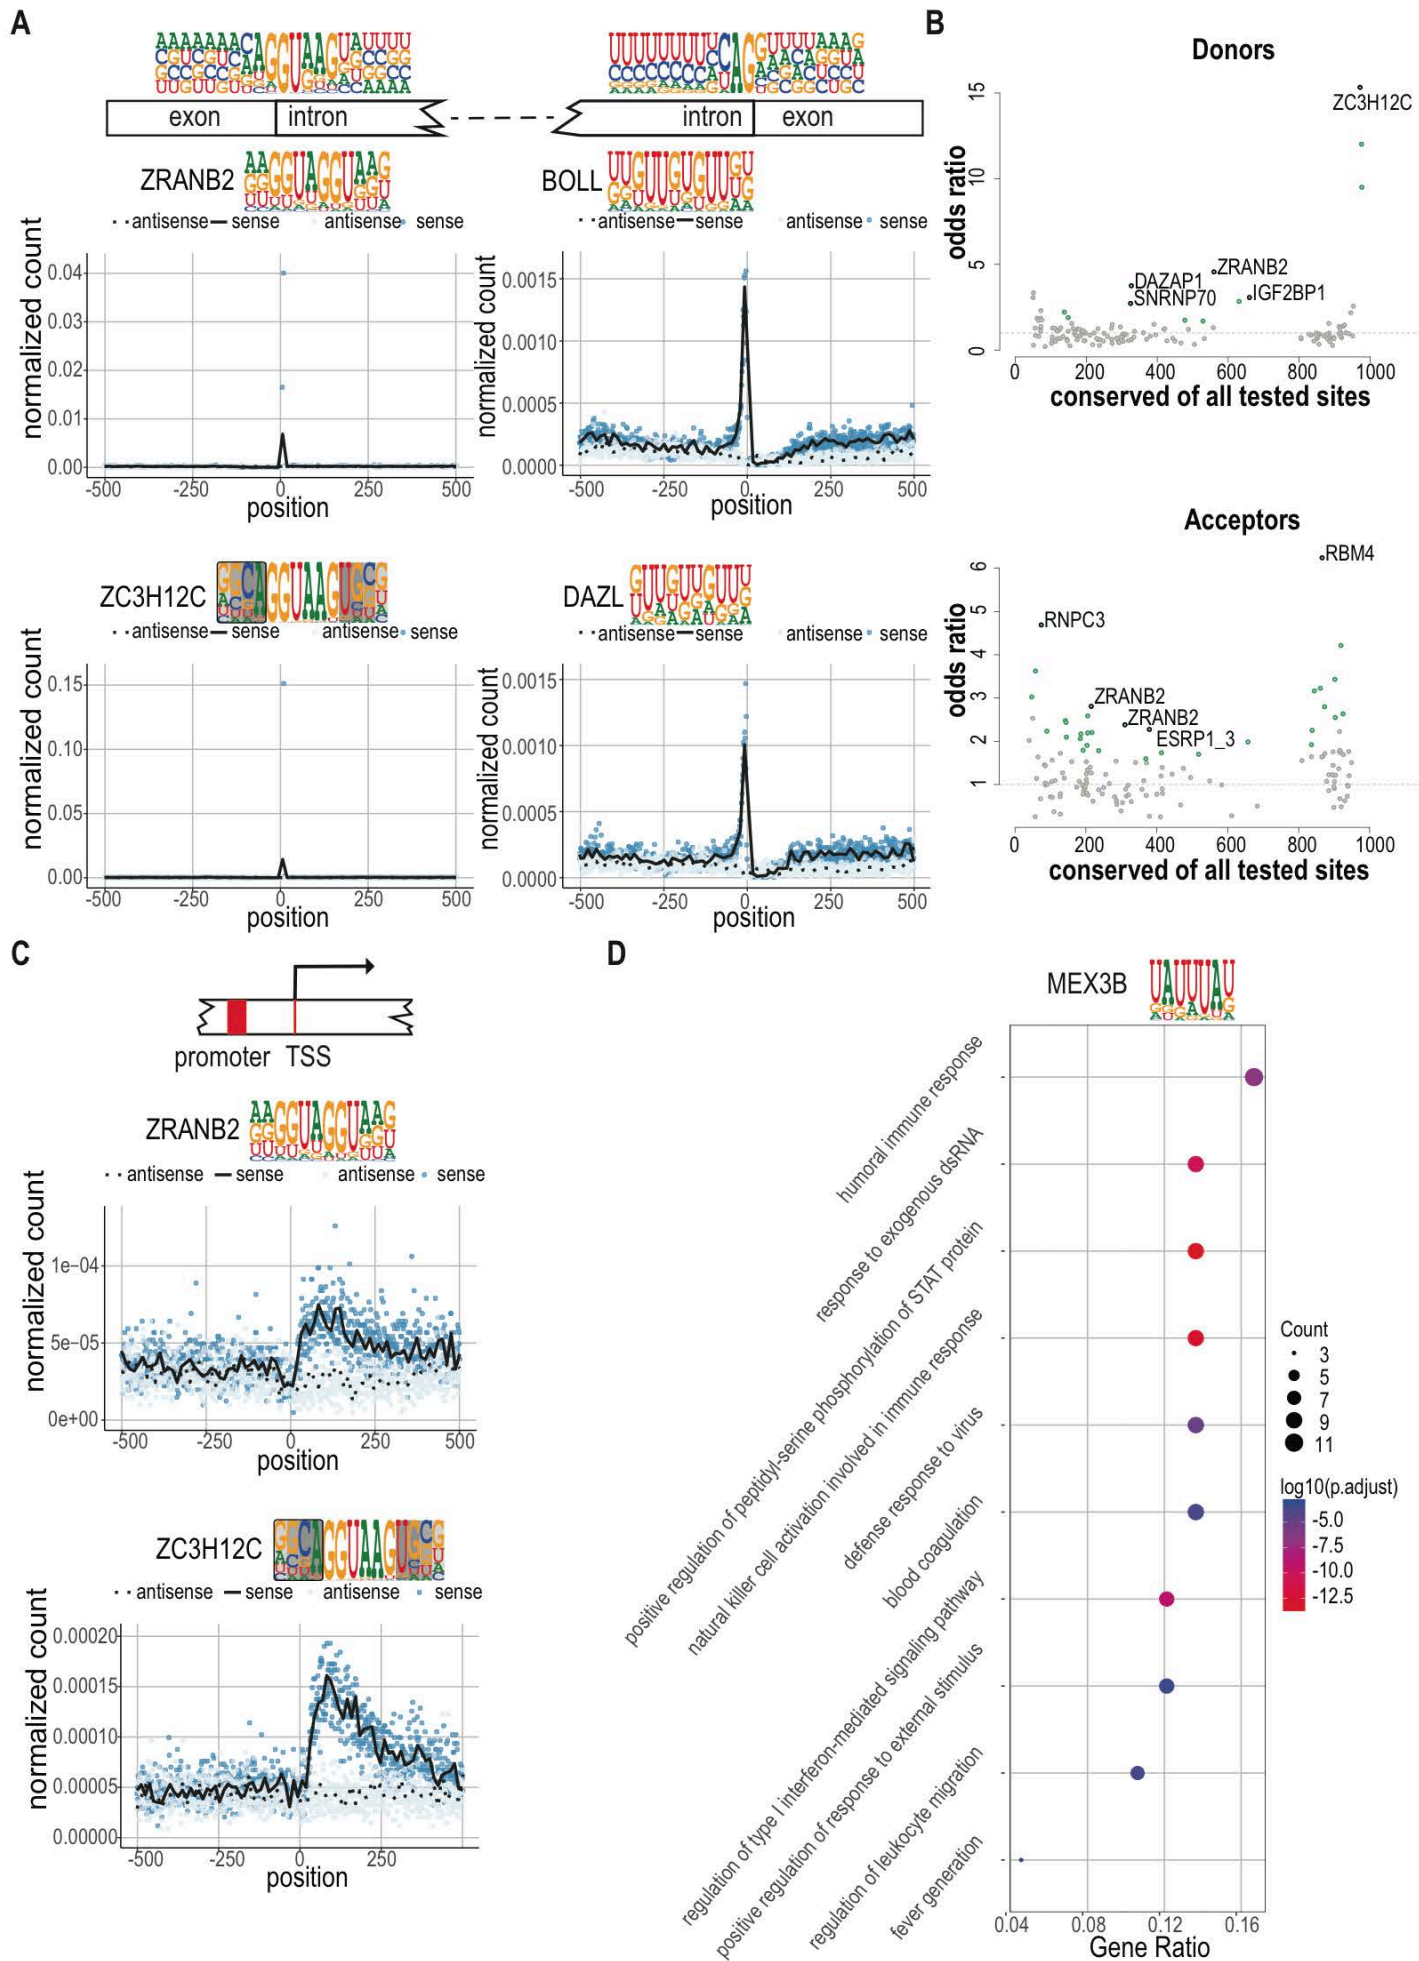



# Jolma et al. 2018 Figure S1

|        |           | HTR-SELEX |           | RNAcomplete | Similarity score |           |
|--------|-----------|-----------|-----------|-------------|------------------|-----------|
|        |           | Primary   | Secondary |             | Primary          | Secondary |
|        | RBFOX1    |           |           |             | 10.17            |           |
|        | RBM42     |           |           |             | 9.4              |           |
|        | SNRPA     |           |           |             | 7.98             | 7.91      |
|        | RBM4      |           |           |             | 7.96             | 3.17      |
|        | PABPC5    |           |           |             | 7.92             | 4.71      |
| RRM    | SNRNP70   |           |           |             | 7.8              | 7.07      |
|        | ZCRB1     |           |           |             | 7.68             | 7.66      |
|        | HNRNPA1L2 |           |           |             | 7.17             |           |
|        | HNRNPCL1  |           |           |             | 6.85             |           |
|        | HNRNPA1   |           |           |             | 6.7              |           |
|        | DAZAP1    |           |           |             | 5.39             |           |
|        | HNRNPC    |           |           |             | 5.1              |           |
|        | RBM24     |           |           |             | 4.88             |           |
|        | CELF4     |           |           |             | 4.41             |           |
|        | PCBP1     |           |           |             | 4.26             |           |
| ELAVL1 |           |           |           | 3.67        |                  |           |
| MSI1   |           |           |           | 3.45        |                  |           |
| HNRNPL |           |           |           | 2.77        |                  |           |
| RBMS3  |           |           |           | 1.38        | 2.17             |           |
| RBM46  |           |           |           | 1.1         |                  |           |
| RBMS1  |           |           |           | 0.96        | 3.96             |           |
| RBM28  |           |           |           | -1          | 0.21             |           |
| RALY   |           |           |           | -1.24       |                  |           |
| RBM6   |           |           |           | -1.54       | -2.71            |           |
| SART3  |           |           |           | -3.24       |                  |           |
| ZNF    | ZC3H10    |           |           |             | 3.42             | 5.41      |
|        | TARDBP    |           |           |             | 3.88             | 3.66      |
| KH     | QKI       |           |           |             | 9.86             |           |
|        | KHDRBS1   |           |           |             | 6                |           |
|        | KHDRBS2   |           |           |             | 4.24             |           |
|        | KHDRBS3   |           |           |             | 3.25             |           |
| CSD    | YBX1      |           |           |             | 5.06             | 6.16      |
|        | YBX2      |           |           |             | 7.26             | 3.01      |



## Jolma et al. 2018 Figure S2

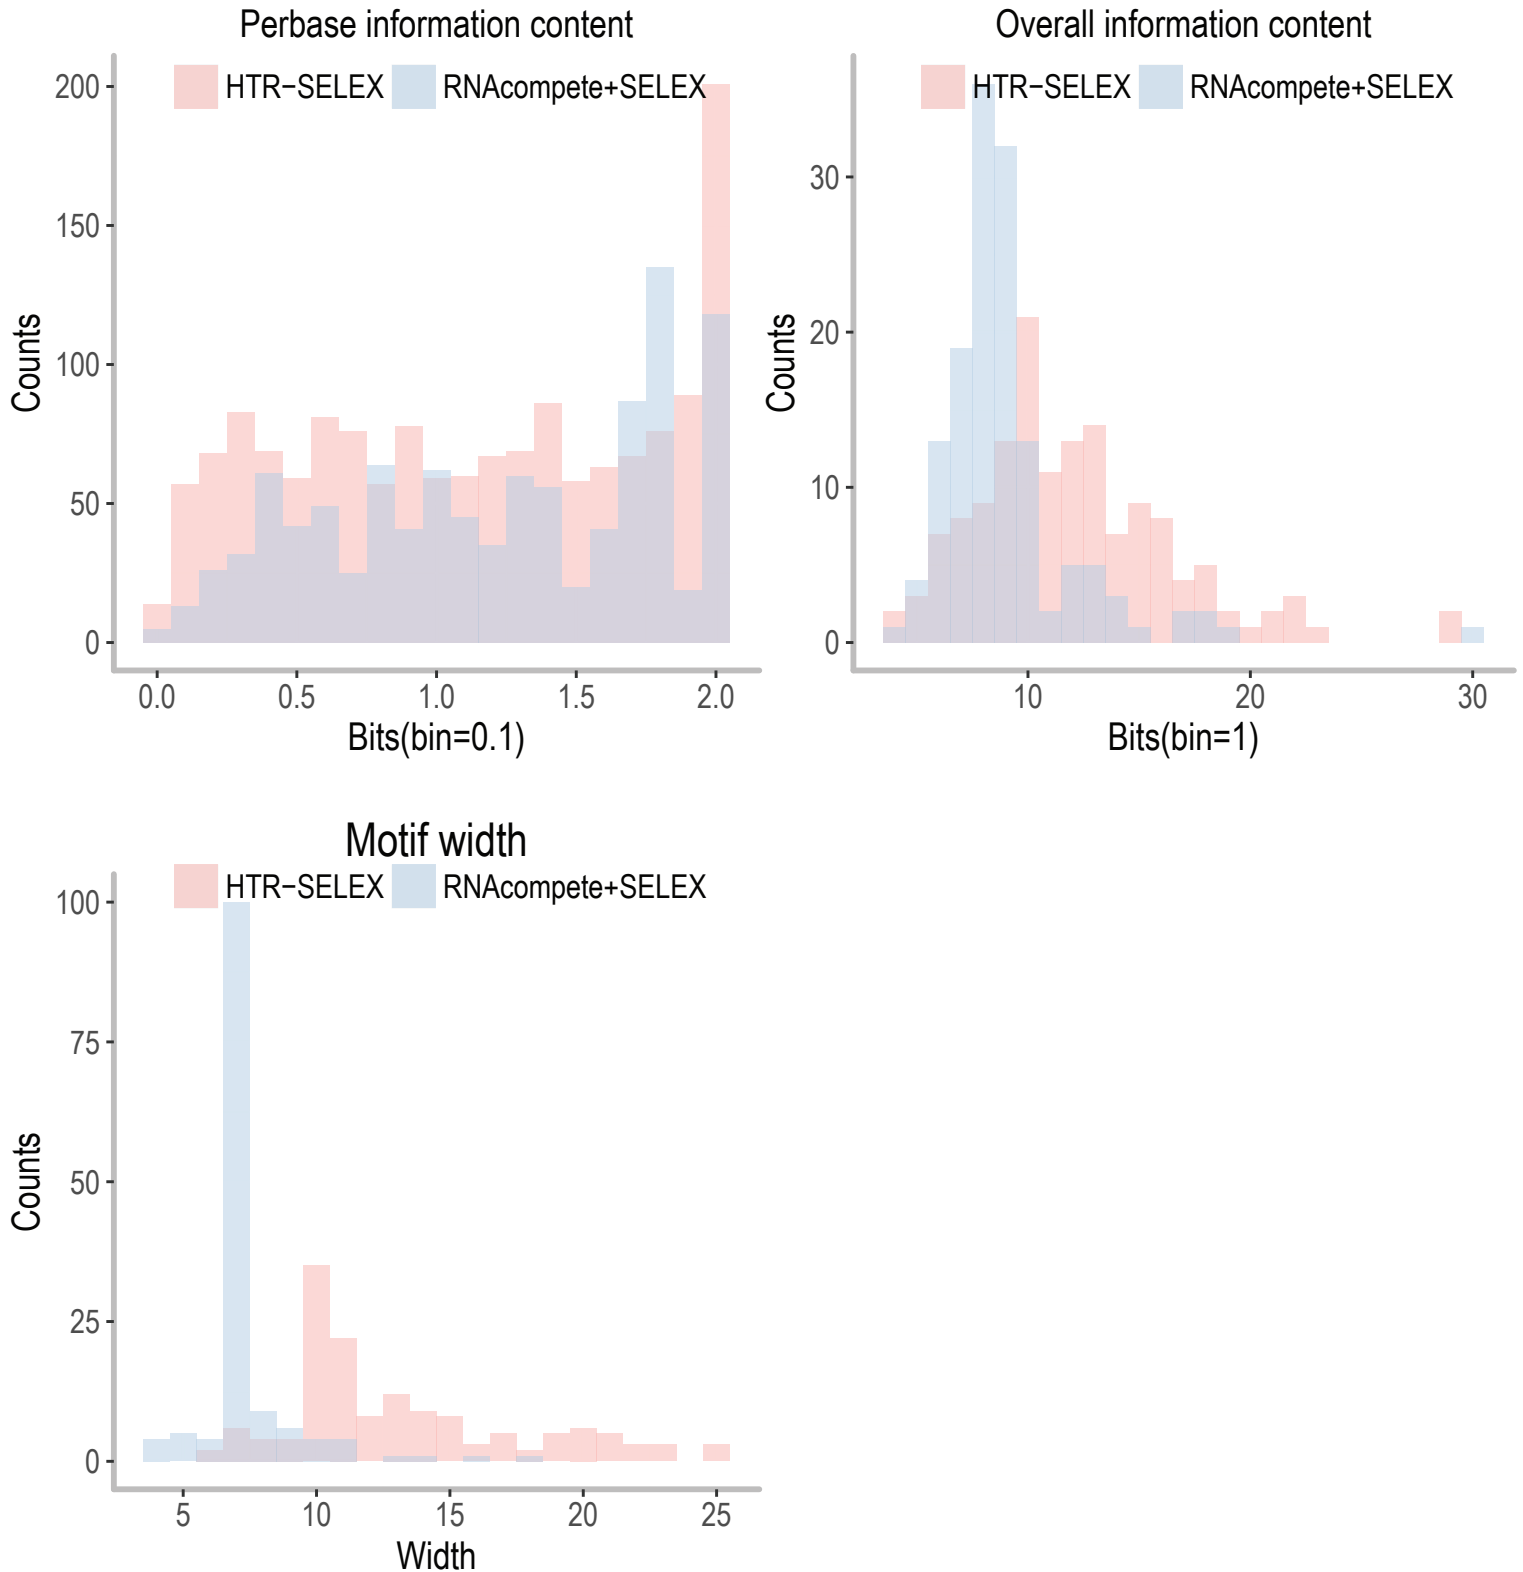

## Jolma et al. 2018 Figure S3

RBPs with dimeric binding specificities

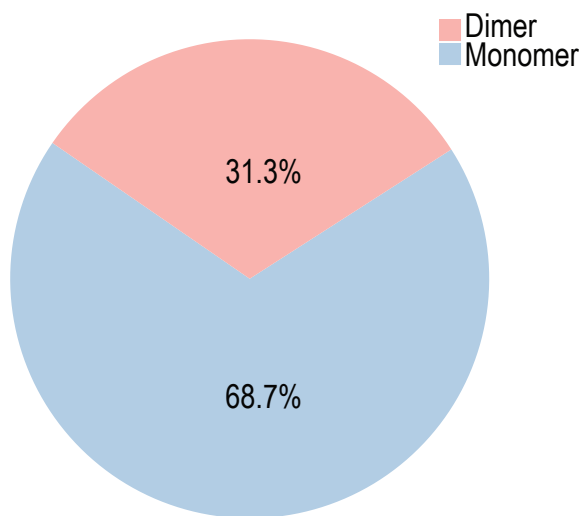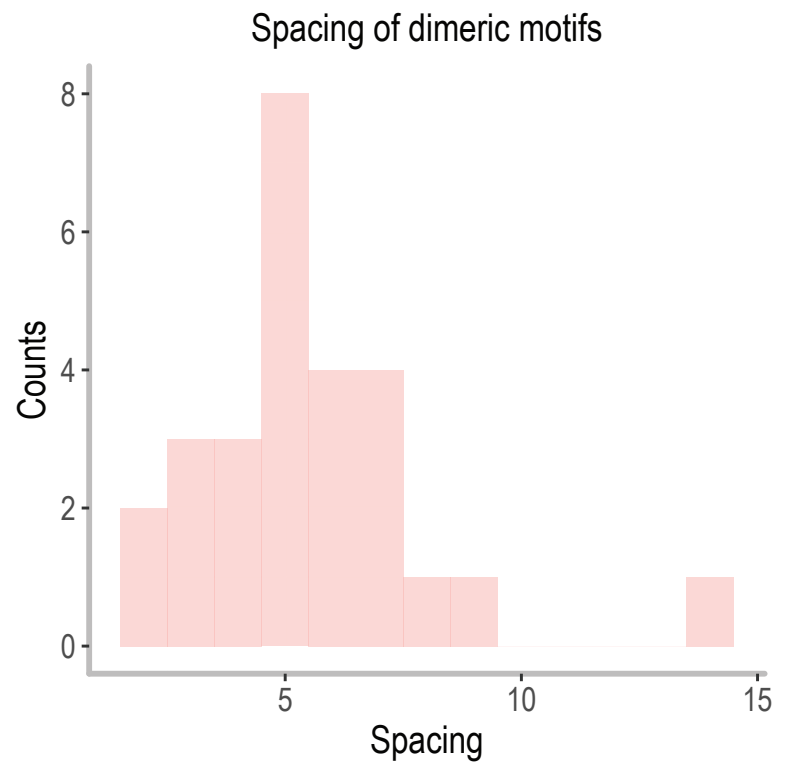

# Jolma et al. 2018 Figure S4

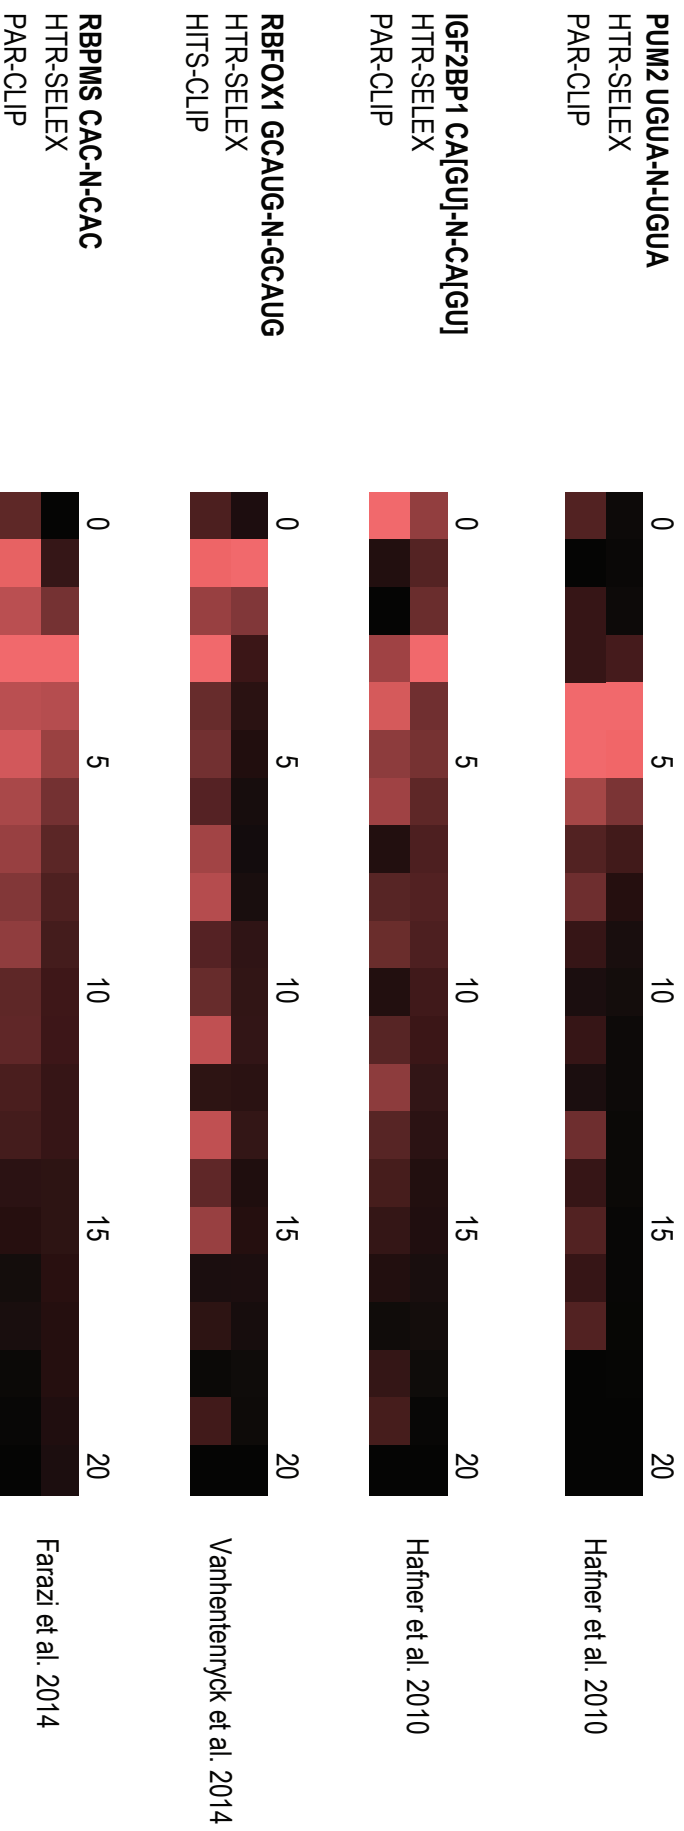

**Instances of CAC  
in RBPMS HTR-SELEX reads**

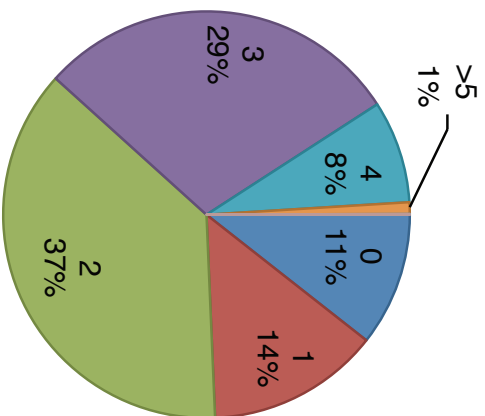

**Instances of CCA  
in RBPMS HTR-SELEX reads**

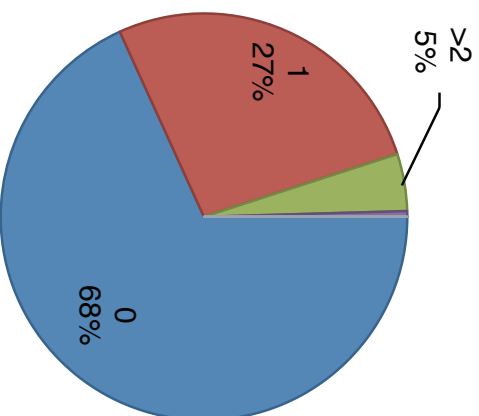

**Instances of CAC  
in RBPMS PAR-CLIP clusters**

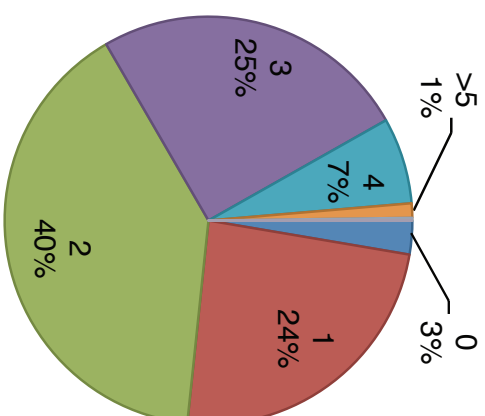

# Jolma et al. 2018 Figure S5

Probability >= 99%  
 99% > Probability >= 95%  
 95% > Probability >= 90%  
 90% > Probability >= 80%  
 80% > Probability >= 70%  
 70% > Probability >= 60%  
 60% > Probability >= 50%  
 50% > Probability

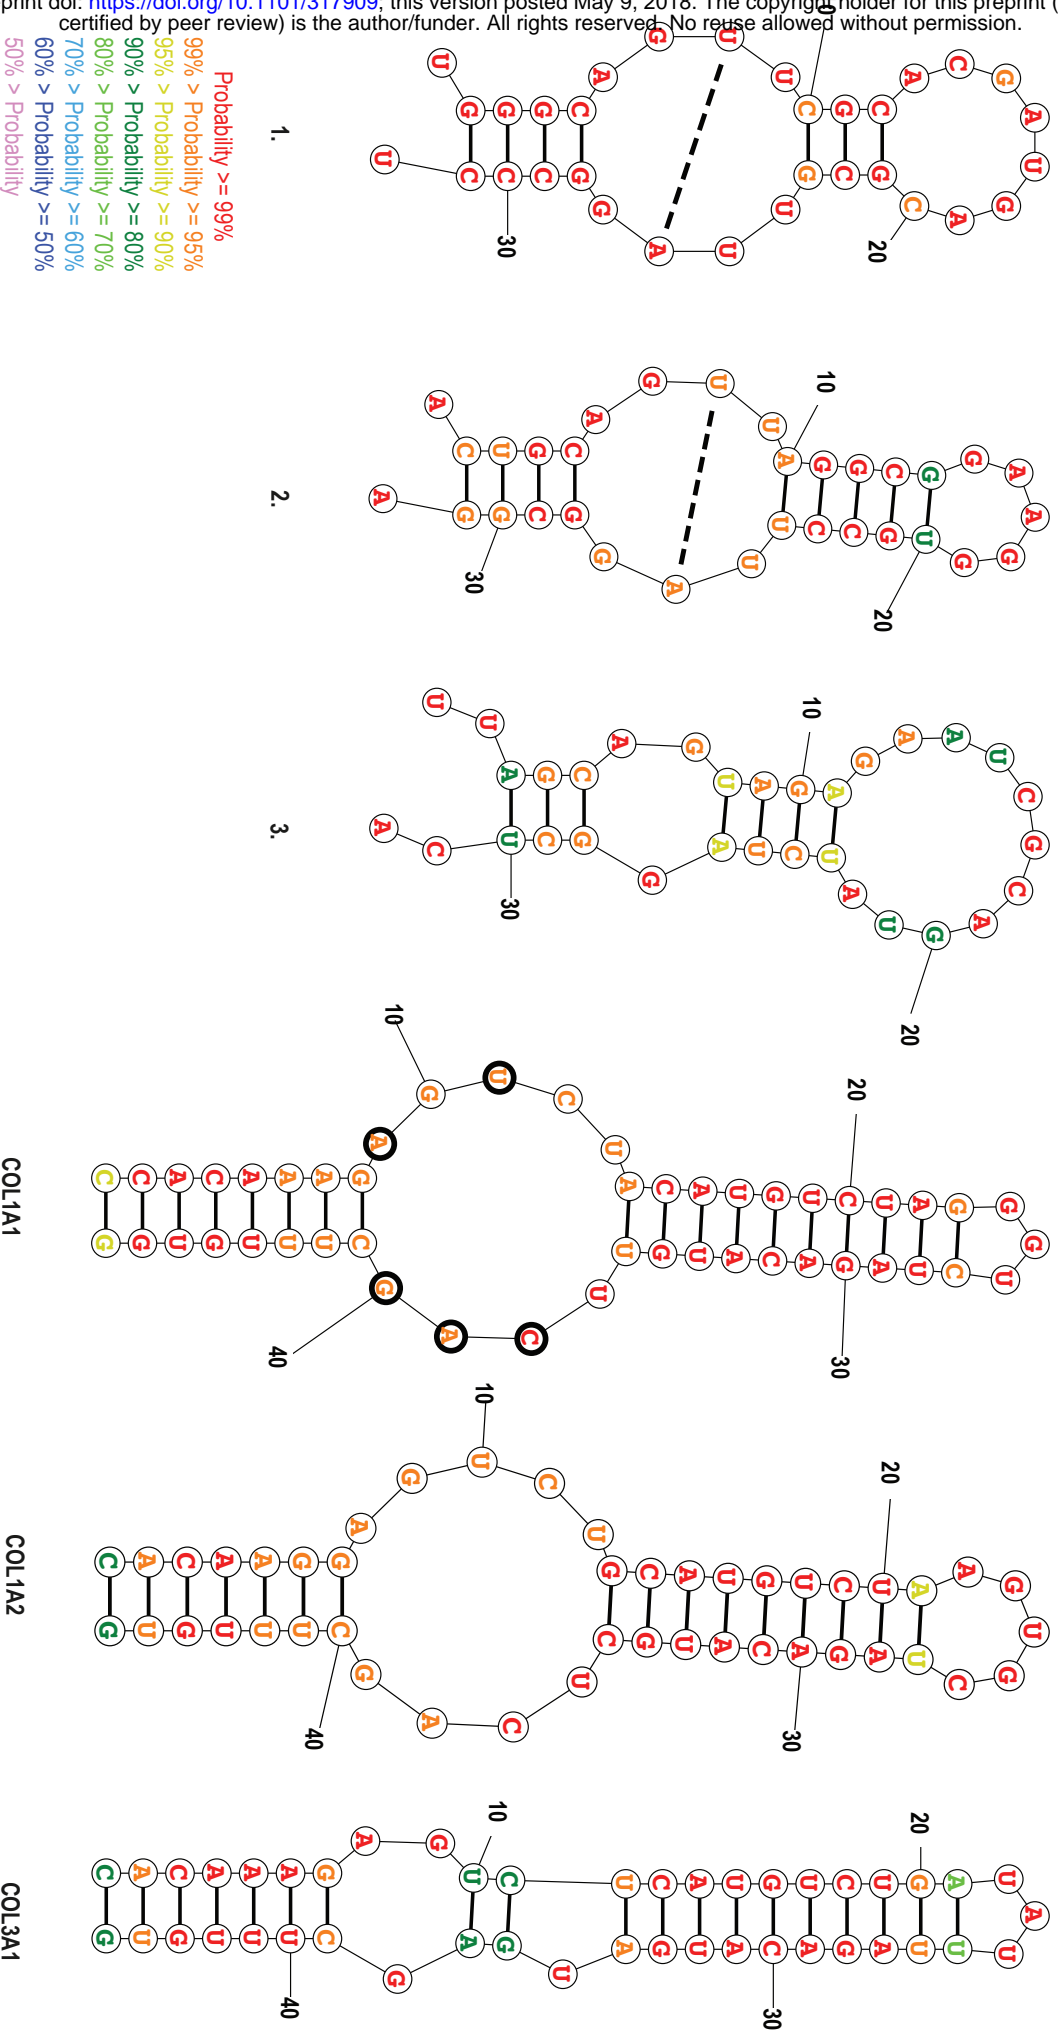

# Jolma et al. 2018 Figure S6

## RBP Families with structural motifs

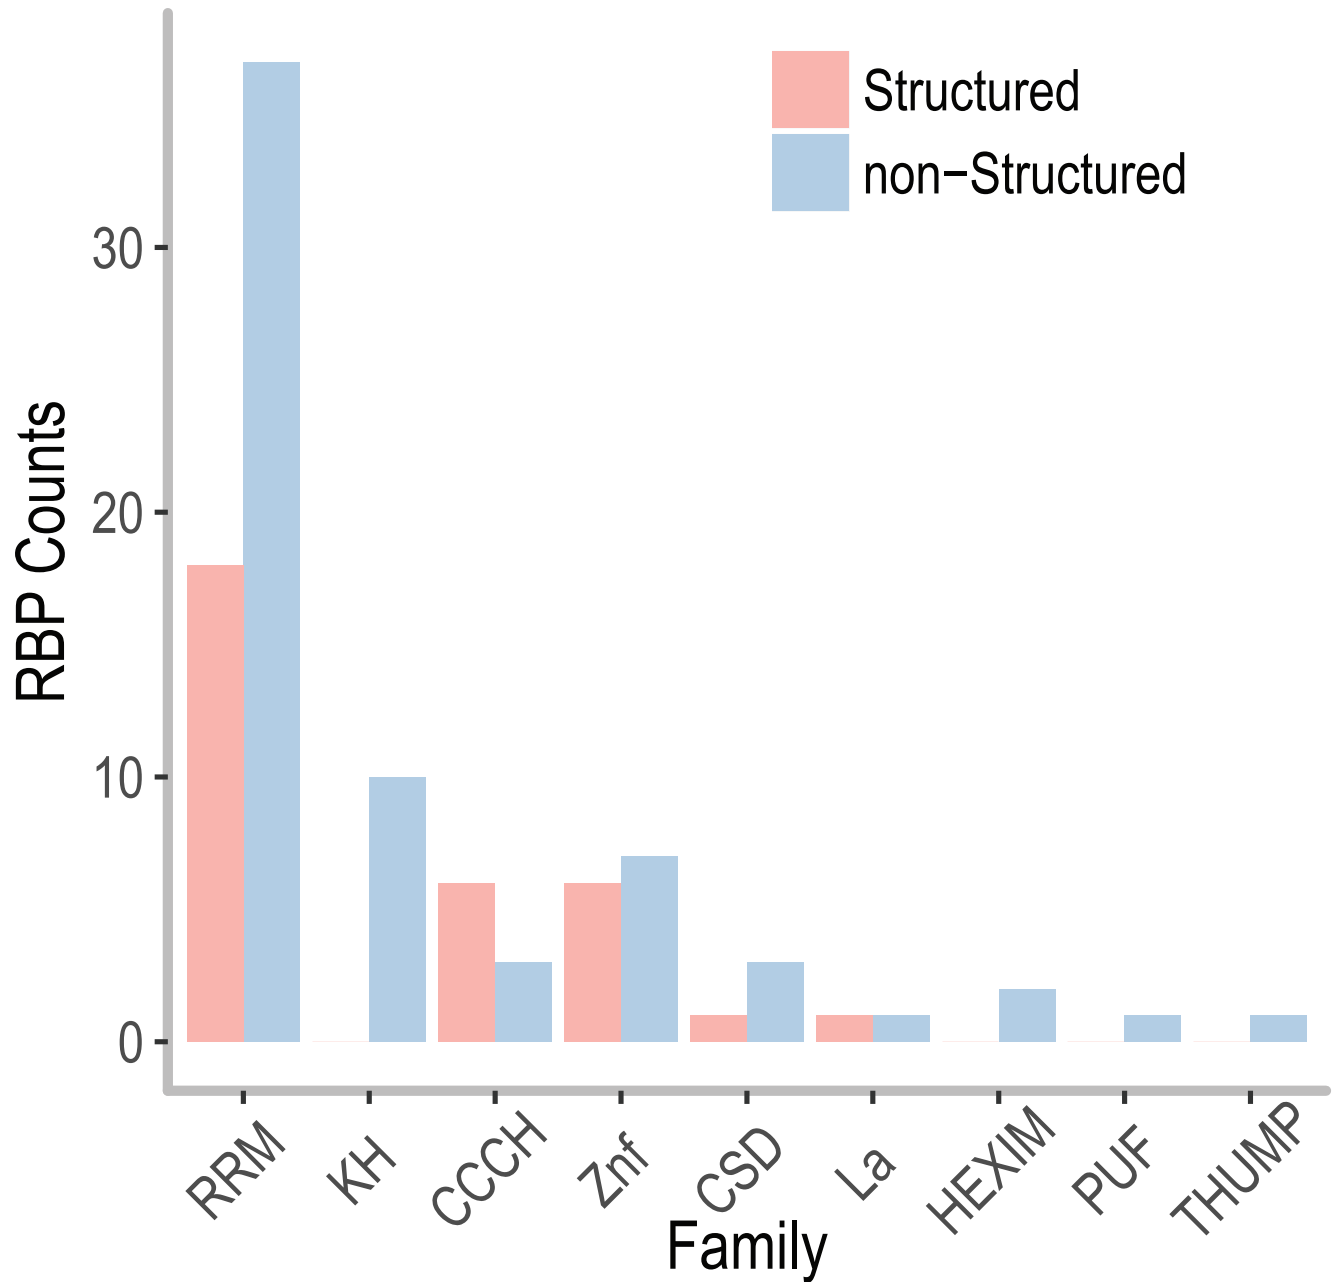



## Jolma et al. 2018 Figure S7

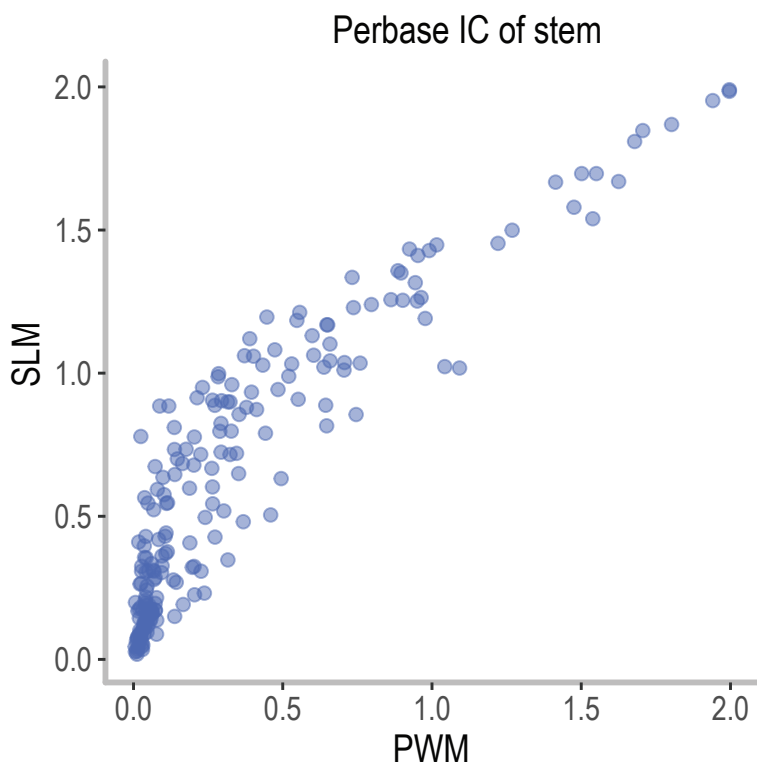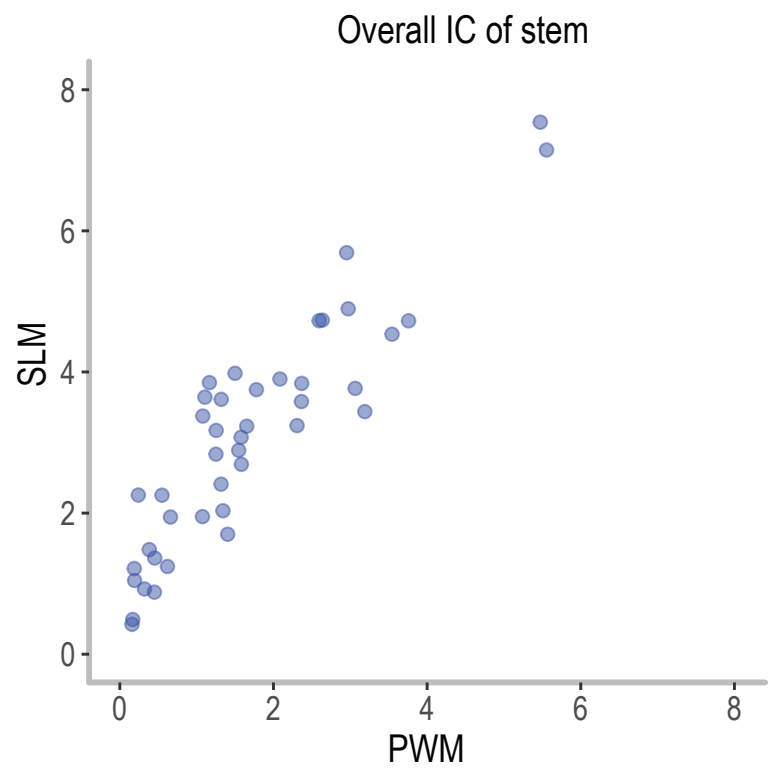

# Jolma et al. 2018 Figure S8

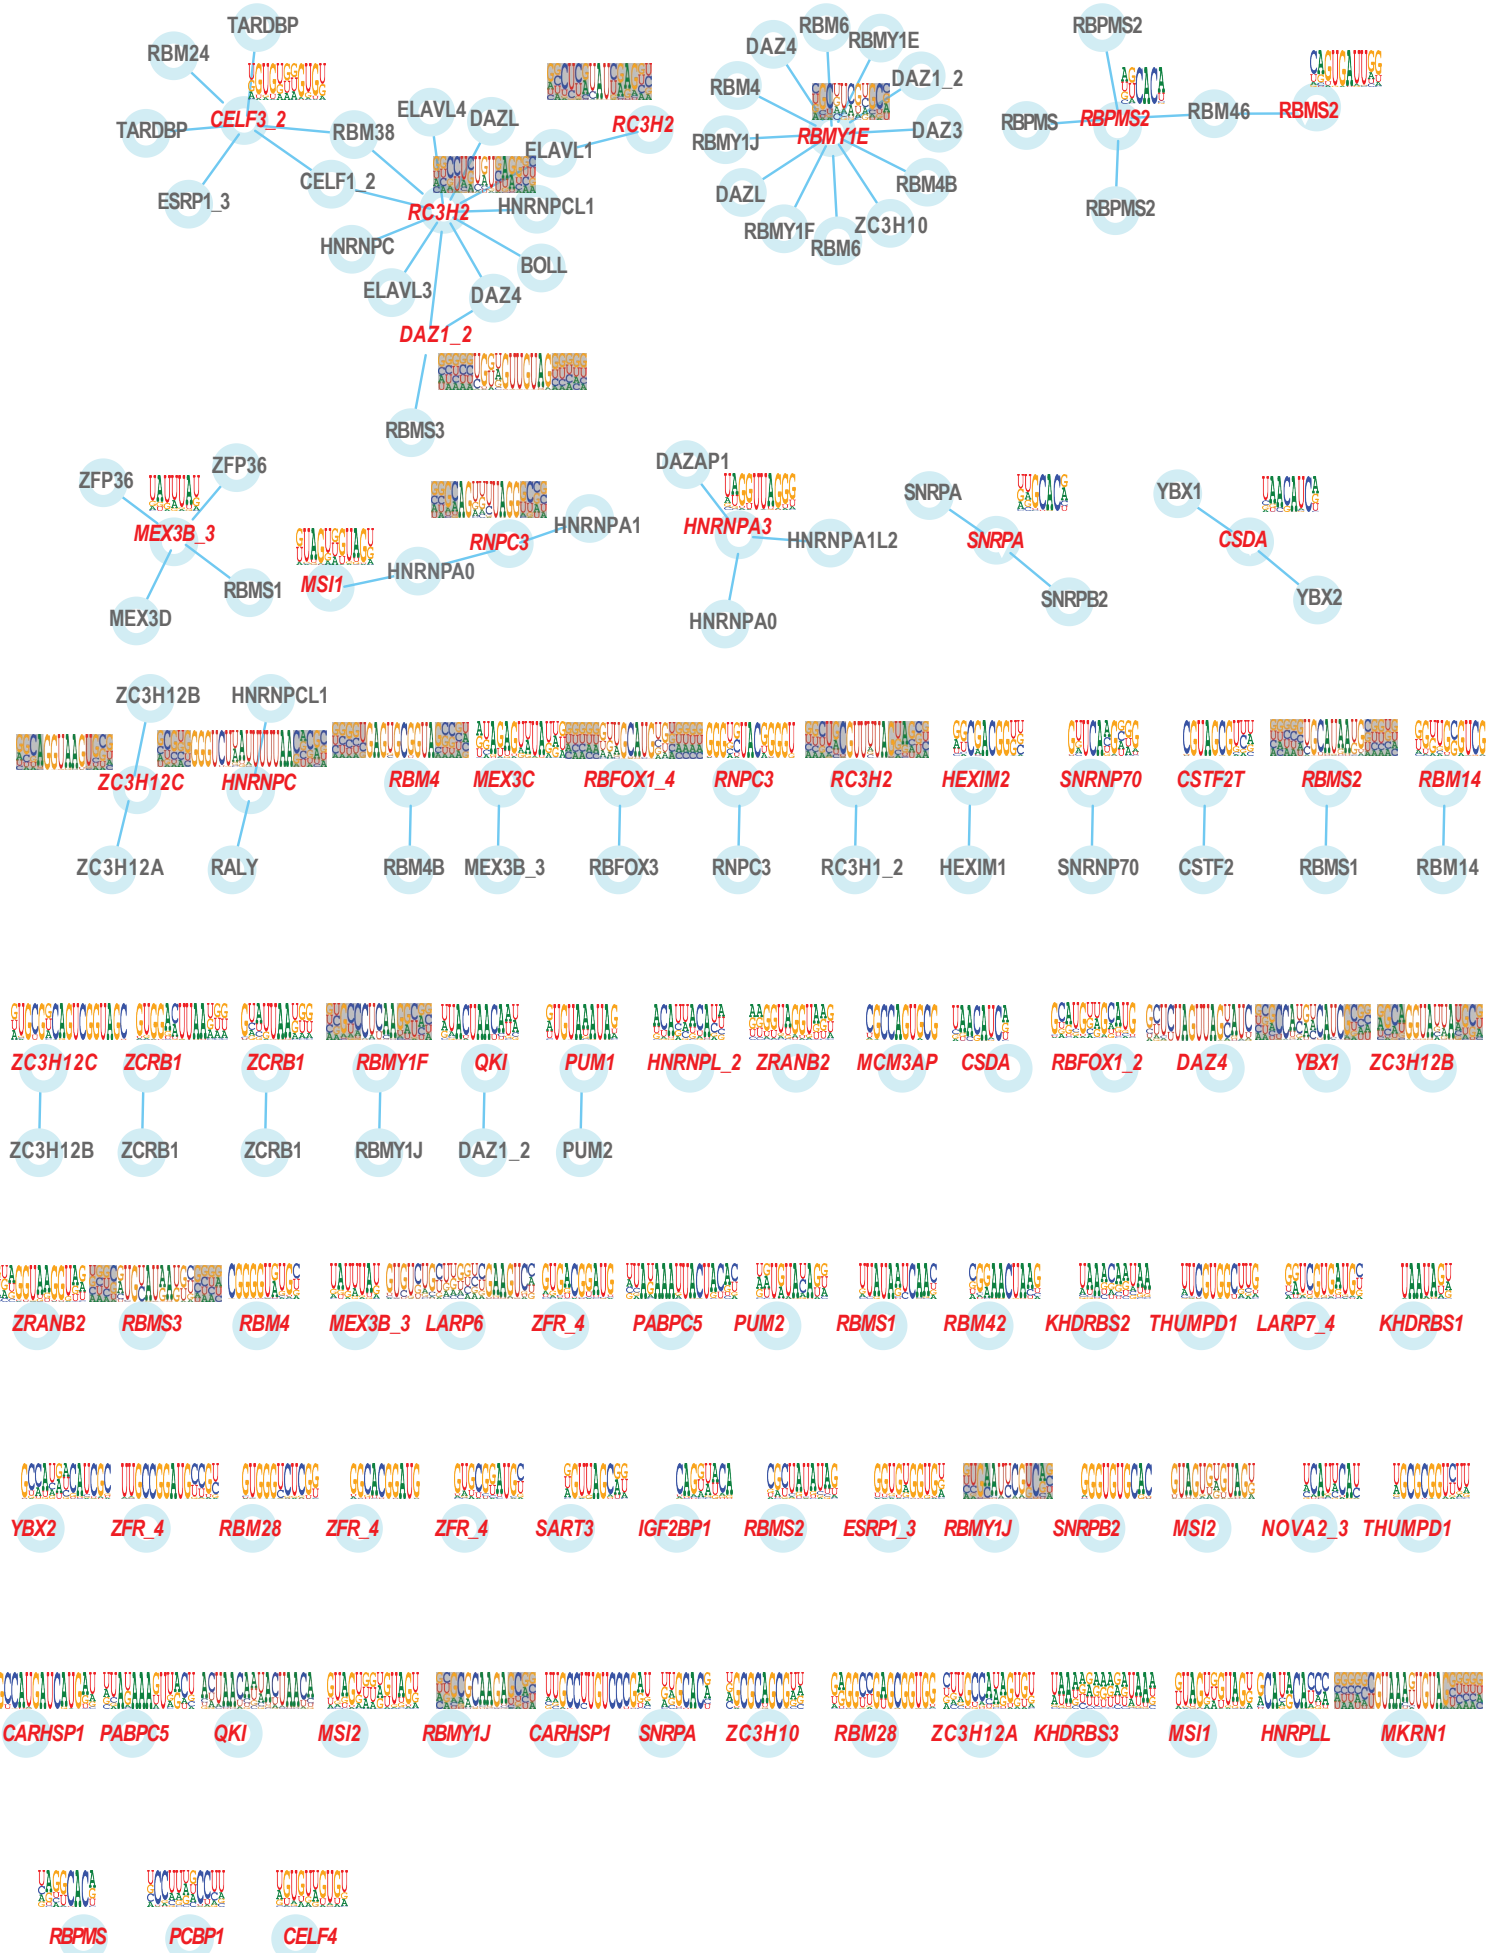

# Jolma et al. 2018 Figure S9

## A Simple non-structured motifs

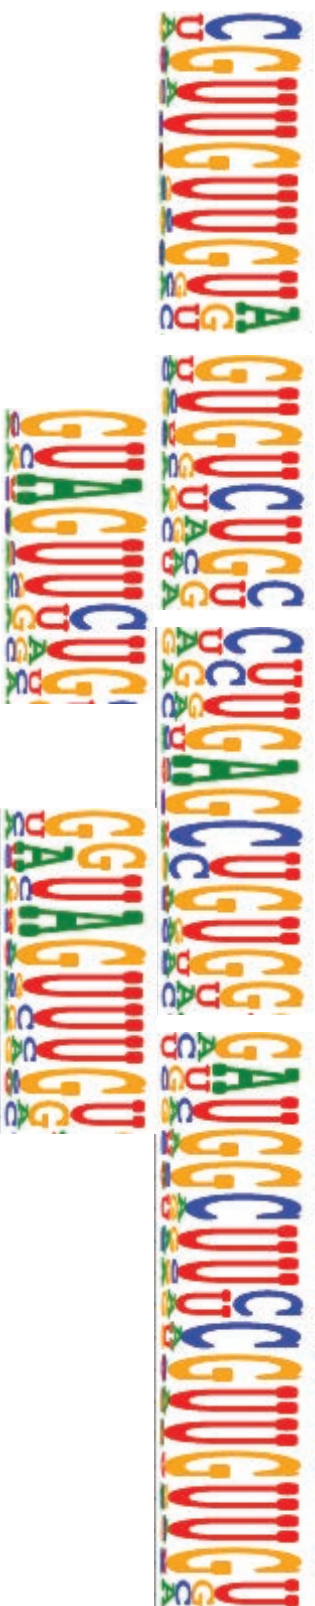

## B Variably gapped non-structured motifs

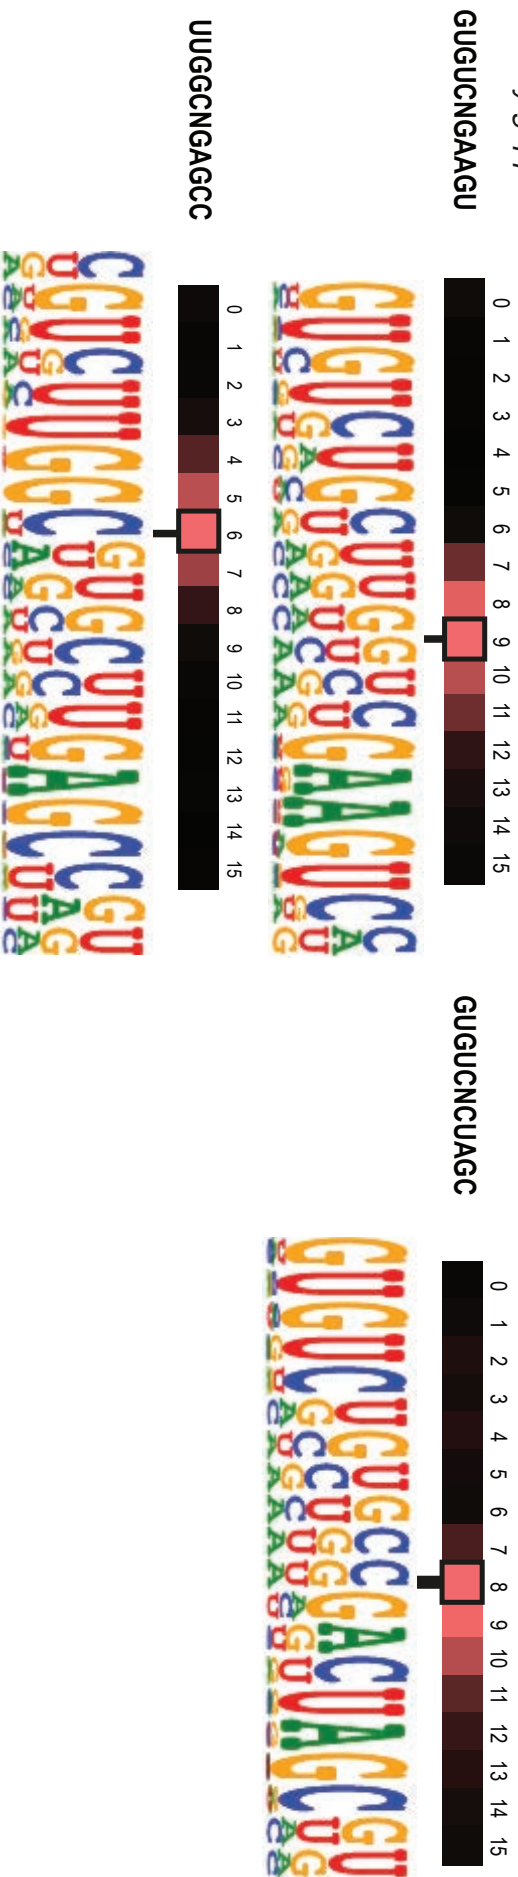

# Jolma et al. 2018 Figure S10

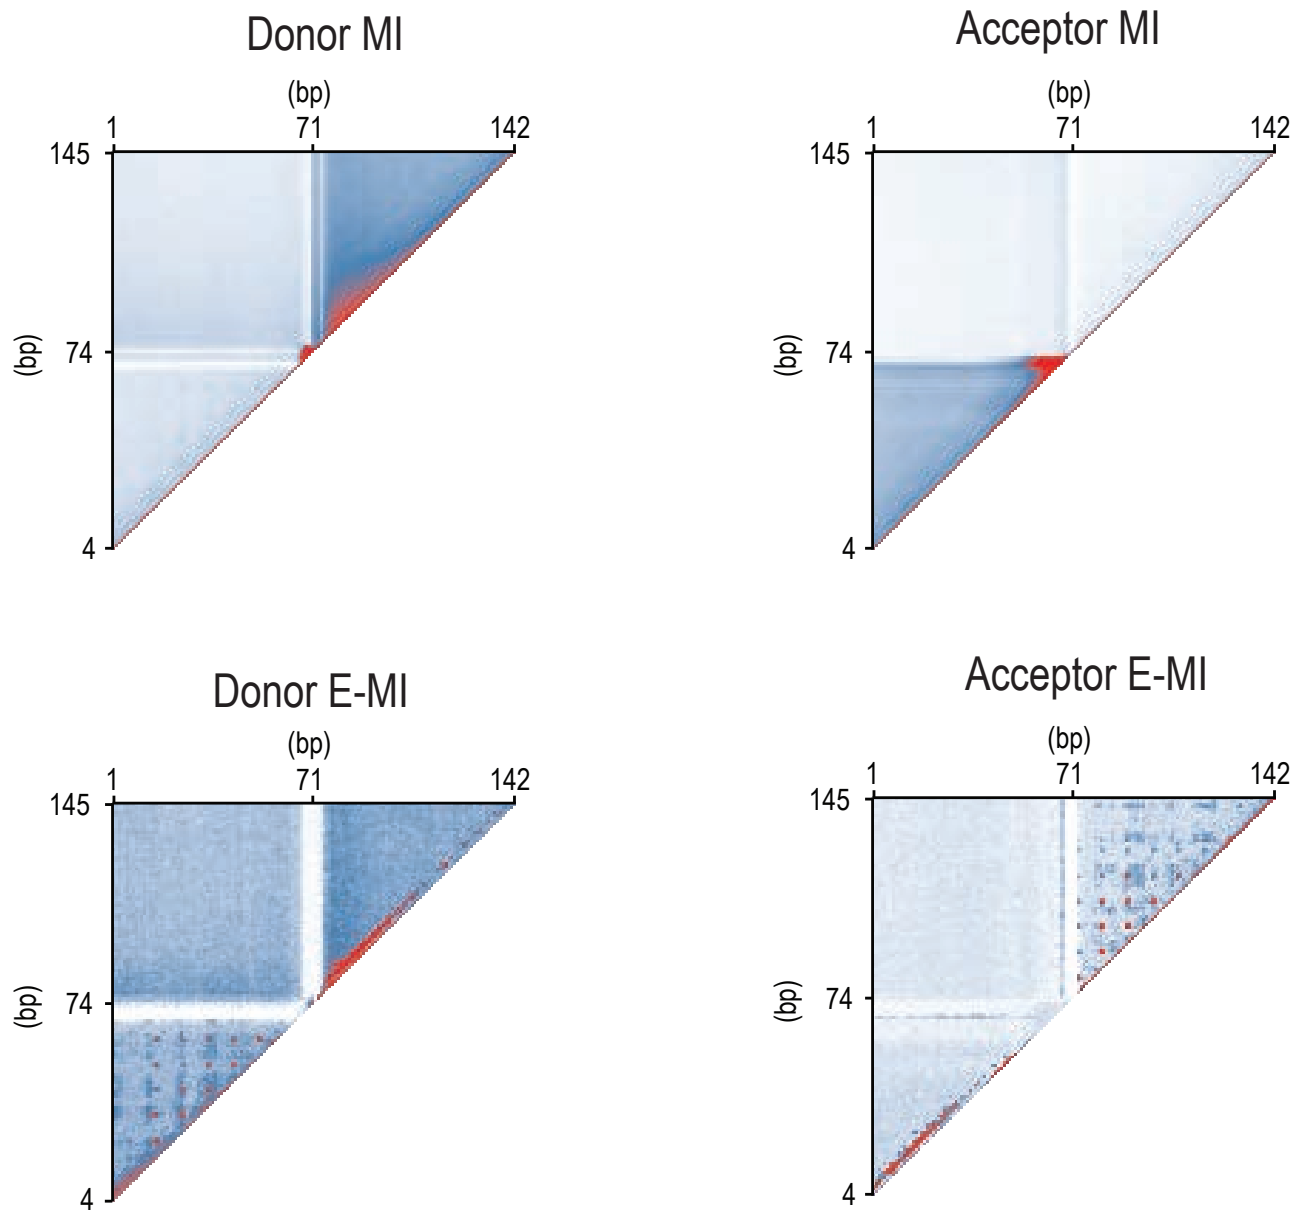

Source: https://www.biorxiv.org/content/10.1101/317909v1.full.pdf
